# Supplementary material for: Fast and Accurate Estimation of Gas-Phase Entropy from the Molecular Surface Curvature
Source: Research Square preprint supplement (doi:10.21203/rs.3.rs-605435/v1), 2021-07-02
Supplement: Supplementary file 2 [file 8b2f1306644092eb87697634.xlsx]

## Sheet: FINALDATA
SMILES	MOLID	S0_Exp	PSF_CURV	PSF_SHPIDX
[N]=O	AL00005	210.6	NA	NA
N#P	AL00007	211.1	5.916	11.94
[O-][Cl+](#N)=O	AL00016	272.2	7.753	22.45
[O-][O+]=O	AL00017	238.82	NA	NA
ClP(Cl)Cl	AL00019	311.57	12.05	37.024
FP(F)F	AL00020	272.6	7.981	25.531
FOOF	AL00033	277.21	7.029	19.71
[O]Br	AL00035	233	NA	NA
[O][Br]=O	AL00036	271.12	6.712	16.726
F[Cl](F)F	AL00037	281.51	7.951	20.101
O=[P]	AL00039	222.8	NA	NA
O=S	AL00040	222	NA	NA
O=S=S	AL00041	267.02	8.099	19.262
FP(=S)(F)F	AL00043	298.15	11.707	26.362
FS(=S)F	AL00044	292.83	11.057	28.956
FSSF	AL00045	294.08	11.083	32.754
P#P	AL00046	218.1	NA	NA
S=S	AL00047	228.2	NA	NA
ClSSCl	AL00050	327.21	13.825	31.816
O=N(=O)N(=O)=O	AL00051	304.3	9.252	21.554
[O]F	AL00052	247.46	NA	NA
FNF	AL00054	252.8	6.723	18.012
[N-]=[N+]=N	AL00056	238.72	6.828	18.073
OCl	AL00061	236.56	4.577	13.966
OO	AL00078	232.88	5.976	17.861
NN	AL00088	238.61	7.87	18.768
FC=CF	AL00225	268.81	9.308	25.483
N#CCC#N	AL00331	287.52	11.107	32.223
FC(CC(F)(F)F)(F)F	AL00332	377.3	14.048	40.517
FC(C(C(F)(F)F)F)F	AL00333	383.4	13.961	37.457
c1cccs1	AL00486	278.4	13.782	28.072
O=C1CCC(=O)O1	AL00492	335	13.43	31.813
c1ccc[nH]1	AL00501	270.5	12.95	33.53
OC1=NC(=O)CC1	AL00505	320.3	14.205	38.364
C/C=C/C#N	AL00506	315.98	13.799	33.657
C/C=C\C#N	AL00507	309.29	13.799	33.657
C1CC=CO1	AL00513	281.4	13.171	36.115
O1CC=CC1	AL00514	284.84	13.535	31.936
S1CC=CC1	AL00515	297.1	15.174	35.818
CC(=C)C=O	AL00516	332	13.723	30.104
CC(=O)OC(=O)C	AL00518	389.9	16.54	43.815
C=COC=C	AL00520	334	14.813	31.331
CC(=C)C(=O)O	AL00521	350	14.339	39.148
COC(=O)C=C	AL00522	366	15.079	41.641
C/C=C/C=O	AL00523	317.3	13.843	38.022
C/C=C/C(=O)O	AL00524	356.7	14.959	38.263
C/C=C\C(=O)O	AL00525	351	14.514	36.238
CC(=O)OC=C	AL00526	328	15.617	47.282
O=C1CCCO1	AL00530	305.4	14.095	36.354
ClC(C=C)CCl	AL00535	371	16.728	46.703
ClC/C=C/CCl	AL00536	383	17.471	48.674
CC(C#N)C	AL00538	313.53	14.357	40.312
CCCC#N	AL00540	325.93	14.684	39.724
COCCC#N	AL00544	364.45	16.581	43.561
OC1=NCCC1	AL00545	301.2	14.802	39.59
CCC1CO1	AL00551	322	14.873	43.133
C1CCOCO1	AL00552	303.08	15.178	36.861
C1CCSCS1	AL00553	333.5	18.096	48.006
ClCCCCCl	AL00554	389	17.675	55.539
O1CCOCC1	AL00555	300.12	14.878	40.216
CCC(=O)C	AL00558	339.4	15.357	41.887
CC(C(=O)O)C	AL00559	341.2	15.536	49.739
ClCCOCCCl	AL00562	423.1	19.638	58.092
CCCC=O	AL00563	341.8	14.75	42.317
CCCC(=O)O	AL00564	360.1	15.963	42.824
C/C=C\C	AL00566	301.2	14.121	45.375
CCOC=C	AL00567	349	15.82	43.682
O=CC(C)C	AL00568	331.2	14.711	46.241
CC1CC1	AL00569	285.74	13.458	30.381
CCCOC=O	AL00571	367.8	15.828	40.621
O=S1(=O)CCCC1	AL00572	347.5	17.097	44.763
C1CCCO1	AL00573	297.29	14.766	38.574
OC/C=C/CO	AL00574	378.3	16.465	45.7
OC/C=C\CO	AL00575	383.4	15.854	45.093
CCC(=O)OC	AL00577	359.6	16.499	46.556
C/C=C/C	AL00584	296.5	14.1	33.14
CC1(C)OC1	AL00585	300.7	14.986	40.932
CC(Br)(C)C	AL00589	332.61	16.058	41.182
C1CCCN1	AL00593	309.45	15	46.089
CC(N(=O)=O)(C)C	AL00603	362.25	16.569	44.008
CC(=O)N(C)C	AL00604	351	16.497	41.214
CC(F)(C)C	AL00605	304.63	15.299	40.014
COCCOC	AL00606	385	18.1	52.817
OCCCCO	AL00607	381	17.497	39.44
OCC[C@H](O)C	AL00612	375.22	16.438	40.542
OCC[C@@H](O)C	AL00613	375.22	16.438	40.542
OCCOCCO	AL00615	440	18.875	52.295
OCCOCC	AL00618	399	18.323	51.59
OCCSCCO	AL00620	451	19.854	50.115
CCOS(=O)(=O)OCC	AL00624	417	22.595	60.833
CC[C@@H](S)C	AL00625	366.7	17.538	49.289
CC(C(O)C)O	AL00627	399	16.605	47.098
C[C@H]([C@H](O)C)O	AL00628	375.22	16.77	46.968
C[C@@H]([C@@H](O)C)O	AL00629	375.22	16.741	47.441
CC[C@H](O)C	AL00631	349.44	15.954	44.811
CC[C@@H](O)C	AL00632	349.44	15.696	35.695
CCC(CO)O	AL00633	372.64	16.53	46.753
CC(O)(C)C	AL00637	326.3	15.738	43.683
COC(OC)C	AL00638	372.6	17.941	47.837
OCCNCCO	AL00640	429	19.411	62.712
NCC(C)C	AL00642	351	16.206	51.531
CC[C@@H](N)C	AL00644	351.04	16.531	47.68
CCC(CO)N	AL00646	384.66	17.332	34.258
OCCN(C)C	AL00650	384	17.719	47.98
NCCNCCO	AL00652	447	20.423	53.835
NCCNCCN	AL00653	444	21.03	56.711
ClC1=C(Cl)C(C(=C1Cl)Cl)(Cl)Cl	AL00655	456	22.044	68.865
O=Cc1ccco1	AL00666	333.3	14.772	43.54
O=C1C=C(C(=O)O1)C	AL00673	379.7	15.073	41.778
CC#CC=C	AL00679	313.41	15.447	43.238
Cc1ccco1	AL00680	308.99	14.929	41.11
Cc1cocc1	AL00683	310.34	14.54	39.924
OCc1ccco1	AL00687	358	16.003	44.347
C=CCC#C	AL00692	306.7	14.483	41.204
Cn1cccc1	AL00695	307.5	15.713	41.975
CCOC(=O)CC#N	AL00696	413.5	18.767	50.097
O=C1CCCC1	AL00702	315.6	15.54	43.439
CCOC(=O)C=C	AL00704	407	18.283	46.914
COC(=O)C(=C)C	AL00705	401	17.963	51.189
C/C=C/C=C	AL00707	315.6	15.949	47.075
CC(=O)CC(=O)C	AL00709	362.5	17.319	47.817
C1CC21CC2	AL00711	282.76	15.186	41.833
C=C=C(C)C	AL00712	321.51	16.259	44.292
CC=CC=C	AL00717	324.88	15.977	46.451
N#CC(C)(C)C	AL00719	331.21	16.66	44.901
OC(=O)CCC(C(=O)O)N	AL00720	527.6	19.836	51.756
CCCCC#N	AL00722	366.16	16.952	48.16
O=C1CCCN1C	AL00733	347.5	17.854	42.677
S=C1CCCN1C	AL00735	347.5	19.547	55.207
CC1(C)CC1	AL00738	307.79	16.048	41.426
CC(CC(=O)O)C	AL00743	390	17.611	40.43
CCCCOC=O	AL00745	408	18.725	53.413
CCOC(=O)[C@@H](O)C	AL00746	456	19.988	54.548
CCOC(=O)CC	AL00747	402.5	19.728	53.597
O=COCC(C)C	AL00749	406.6	17.864	51.081
O=COC(C)(C)C	AL00750	371.7	18.429	41.189
OC[C@@H]1CCCO1	AL00752	374	17.262	40.963
CCCC(=O)OC	AL00754	398.8	19.291	51.467
OC1CCCC1	AL00757	362.9	16.241	47.111
CC(=O)C(C)C	AL00759	369.9	16.975	38.735
CCOC(=O)OCC	AL00762	404	20.751	55.436
C[C@@H]1C[C@@H]1C	AL00764	309.8	16.376	45.051
CC1CC1C	AL00765	316.85	16.562	39.254
CCC1CC1	AL00766	330.6	16.889	46.303
CC1CCC1	AL00767	295.05	16.16	48.514
CC1CCS(=O)(=O)C1	AL00770	372	19.362	41.303
CC(C=O)CC	AL00771	369	17.214	45.941
CC1CCCS1	AL00772	348.86	18.425	53.92
ClCCC(C)C	AL00774	400.65	18.381	47.317
CCCCCCl	AL00775	397	19.323	55.048
CN1CCCC1	AL00777	329	17.686	53.537
C1CCCNC1	AL00778	337	17.38	45.552
CCC(CF)C	AL00781	372.93	17.306	45.437
BrCCC(C)C	AL00782	392.29	19.152	51.973
CC[C@@H](CBr)C	AL00783	385.92	18.543	53.42
CC[C@H](CBr)C	AL00784	392.29	19.112	49.634
BrCC(C)(C)C	AL00785	362.94	18.668	49.979
CC(C(C)C)Br	AL00786	382.76	19.146	54.148
CCC(CC)Br	AL00787	392.29	19.107	61.769
CCCC(Br)C	AL00788	392.29	19.053	55.844
CCC(F)(C)C	AL00789	343.59	17.352	47.393
CCCCCF	AL00790	383.97	18.507	55.971
OCCCCCO	AL00793	433	19.621	55.379
CCC(CO)C	AL00794	386.9	18.24	48.817
CCC(CC)O	AL00796	382	18.509	45.282
COCCOCCO	AL00797	476	22.171	65.72
CCOCCC	AL00801	388.1	19.638	54.362
CCCCOC	AL00803	390.1	19.641	57.701
COC(C)(C)C	AL00805	358	18.034	43.228
SCCC(C)C	AL00806	401.1	20.04	53.151
OCCC(C)C	AL00807	386.9	18.078	55.987
CCC[C@H](O)C	AL00809	391.39	18.8	44.798
CCC[C@@H](O)C	AL00810	391.39	18.227	43.361
CCOCOCC	AL00811	417.7	21.235	47.333
CCCOCCO	AL00813	438	20.746	67.236
CCC(OC)C	AL00815	384	18.905	51.118
CC(C(C)C)O	AL00816	379.4	18.158	48.672
OCC(CO)(C)C	AL00817	416.7	18.104	42.461
CC(CC(O)C)O	AL00818	426.8	19.352	58.134
CCNCCC	AL00819	393.31	19.247	56.99
CCN(CC)C	AL00821	377.4	19.604	53.558
OCCN(CCO)C	AL00822	470.9	20.981	49.814
CCCCCN	AL00823	402	19.919	55.216
NCCCCCN	AL00824	450.8	21.103	58.812
Clc1ccc(c(c1)Cl)Cl	AL00833	380.91	19.387	44.653
Clc1c(Cl)cccc1Cl	AL00836	369.56	19.116	54.944
Clc1cc(Cl)cc(c1)Cl	AL00837	362.72	19.416	55.206
Brc1ccccc1Br	AL00838	371.49	18.146	41.406
Brc1cccc(c1)Br	AL00843	366.9	18.118	56.878
O=N(=O)c1ccccc1Cl	AL00844	370.83	18.414	40.75
Clc1cccc(c1)N(=O)=O	AL00845	373	18.614	48.703
Clc1ccc(cc1)N(=O)=O	AL00846	367	18.253	48.811
Oc1cccc(c1)Cl	AL00858	351	17.135	44.959
Oc1ccc(cc1)Cl	AL00869	345	17.07	38.123
Nc1ccccc1Cl	AL00870	356	17.705	47.547
Oc1cccc(c1)O	AL00872	318	16.571	45.484
Nc1ccc(cc1)N(=O)=O	AL00877	376.81	18.386	54.318
Nc1ccc(cc1)Cl	AL00878	356	17.976	40.137
Oc1ccccc1O	AL00882	345	16.393	36.714
Oc1ccc(cc1)O	AL00883	351.1	16.286	34.107
Cc1ccncc1	AL00885	319.39	17.34	46.07
COC(=O)/C=C\C(=O)OC	AL00890	499	22.968	60.143
NNc1ccccc1	AL00891	351	18.197	48.911
C1=CCC=CC1	AL00892	285.7	16.374	45.581
C1CC=CC=C1	AL00893	303.4	16.095	43.206
CC1=CC=CC1	AL00896	317	16.466	43.057
Nc1ccc(cc1)N	AL00898	349	18.177	40.954
C#CC(C)(C)C	AL00902	335.67	17.576	38.04
CCOC(=O)C(=O)OCC	AL00906	527	23.247	65.359
CC(=CC(=O)C)C	AL00907	398.1	19.1	52.719
CCOC(=O)CC(=O)C	AL00908	442.7	21.785	54.256
CC(=O)OCCOC(=O)C	AL00910	507	22.767	53.644
C=CC=C(C)C	AL00911	374.37	18.22	49.672
C/C=C/C(=C)C	AL00912	351.4	18.745	46.875
CCCC=C=C	AL00916	372.5	18.813	41.608
CC/C=C/C=C	AL00917	354.7	18.818	49.138
C=CC/C=C\C	AL00918	378.53	18.739	58.842
C=CC/C=C/C	AL00919	374.7	18.704	50.398
CCC=C=CC	AL00920	368.17	19.159	45.604
C/C=C/C=C/C	AL00921	356	19.114	49.71
CC(=C=C)CC	AL00922	365.99	18.992	43.705
CC(C=C=C)C	AL00923	358.64	18.613	57.659
C/C=C(\C=C)/C	AL00924	374.37	18.355	43.017
C/C=C\C(=C)C	AL00925	374.37	17.951	49.956
C/C=C(/C=C)\C	AL00926	374.37	18.355	43.017
C=CCC(=C)C	AL00927	376.35	18	56.592
C=CC(C=C)C	AL00928	356	17.699	50.16
CC=C=C(C)C	AL00929	364.01	19.249	45.001
CCC(=C)C=C	AL00930	376.35	18.543	51.306
CC(=C)C(=C)C	AL00931	355	17.553	49.52
CC(C#C)CC	AL00932	364.18	17.842	46.255
CC(CC#C)C	AL00933	357.13	17.929	49.19
CC#CC(C)C	AL00934	361.16	18.697	56.43
CC(COC(=O)C=C)O	AL00935	498.5	21.041	64.669
C/C(=C\CC)/C=O	AL00936	409.3	18.821	53.927
CCCOC(=O)C=C	AL00937	446	20.086	52.09
N#CCCC(C)C	AL00938	392.3	19.247	50.417
OC1=NCCCCC1	AL00939	362.3	18.883	39.434
CCCCCC#N	AL00945	405.08	20.354	60.481
C=CCNCC=C	AL00947	417.1	20.395	55.515
CCCCC(=O)C	AL00948	417.86	20.704	54.756
CCCCOC=C	AL00949	428	20.931	62.345
CC(=O)CC(O)(C)C	AL00951	438.5	20.45	52.851
CCCC(=O)OCC	AL00952	441.7	22.199	60.491
CCCCCC(=O)O	AL00953	441	21.134	57.793
CC(COC(=O)C)C	AL00954	441	20.952	48.036
CCCCCOC=O	AL00956	447.3	22.031	61.287
CC[C@@H](OC(=O)C)C	AL00957	439.1	21.552	56.921
CC(=O)C(C)(C)C	AL00962	388	19.069	49.642
CC(CC(=O)C)C	AL00965	412.9	19.784	53.239
CCOCCOC(=O)C	AL00967	493	23.285	60.39
CCC/C=C/C	AL00968	380.6	20.501	57.073
CCC1(C)CC1	AL00970	375.79	18.16	44.857
CC[C@H]1C[C@H]1C	AL00971	377.47	18.664	50.838
CC[C@@H]1C[C@H]1C	AL00972	364.05	18.926	57.089
CCCC1CC1	AL00974	384.51	19.087	49.668
CC(C1CC1)C	AL00975	378.47	18.566	56.995
C[C@@H]1CC[C@@H]1C	AL00976	382.16	17.922	50.885
C[C@@H]1CC[C@H]1C	AL00977	382.16	18.79	50.079
C[C@@H]1C[C@@H](C1)C	AL00978	312.73	18.686	51.801
C[C@@H]1C[C@H](C1)C	AL00979	312.73	18.105	57.068
CCC1CCC1	AL00980	341.91	18.848	49.514
CCC/C=C\C	AL00981	386.5	19.236	52.214
CC/C=C\CC	AL00982	379.61	18.822	48.856
CC/C=C/CC	AL00983	374.84	19.425	44.145
C[C@@H](C=C)CC	AL00985	376.81	18.725	41.374
C=CCC(C)C	AL00986	368	19.178	44.701
C/C=C\C(C)C	AL00987	373.34	19.083	51.806
C/C=C/C(C)C	AL00988	368.28	19.565	61.556
CCC=C(C)C	AL00989	364	19.102	45.185
CC/C(=C\C)/C	AL00990	378.44	19.588	48.74
CC/C(=C/C)/C	AL00991	381.8	19.436	55.402
CC(=C(C)C)C	AL00993	364.59	18.414	58.248
CCC(=C)CC	AL00995	376.89	19.192	49.421
CCCOC(=O)CC	AL00996	442	21.255	56.782
NC1CCCCC1	AL00997	351	19.129	50.519
CCCCCCBr	AL01001	440.76	22.39	68.619
CCCC(CC)F	AL01002	411.89	20.588	57.616
CCCCCCF	AL01003	423.79	20.848	56.166
CCN1CCOCC1	AL01008	293.7	20.354	57.593
C[C@@H](CC(O)(C)C)O	AL01009	408.6	21.158	56.544
OCCC(CC)C	AL01010	431.8	20.7	57.636
CCCCOCC	AL01012	429	22.344	53.884
OCCOCCOCC	AL01013	517	24.888	75.242
COCCOCCOC	AL01014	503	25.224	68.386
CCCCOCCO	AL01016	478	23.466	73.311
NCCCC[C@@H](C(=O)O)N	AL01018	529	23.735	58.067
CCOC(C)(C)C	AL01021	406.3	21.309	63.283
OCCOCCOCCO	AL01023	556.5	26.281	71.641
CCCCC(S)C	AL01026	445.28	23.476	60.081
CCCC(CC)O	AL01031	432.3	21.378	59.779
CCCCCOC	AL01032	432	22.23	57.128
CCC(C(CO)C)O	AL01034	465.3	21.073	61.974
CC(NC(C)C)C	AL01037	412	21.212	57.717
ClC(c1ccccc1)(Cl)Cl	AL01044	401	21.754	57.408
ClC(=O)c1ccccc1	AL01046	371.3	18.597	45.123
Clc1ccc(c(c1)Cl)C	AL01049	379	20.508	55.761
Cc1ccc(c(c1)Cl)Cl	AL01050	382.85	20.478	53.873
ClC(c1ccccc1)Cl	AL01052	386	20.45	54.59
O=Cc1ccccc1O	AL01053	388	17.751	40.667
Cc1ccccc1Cl	AL01055	348	18.787	52.51
Cc1ccc(cc1)Cl	AL01056	342	18.945	47.532
Cc1ccccc1F	AL01057	339.02	17.236	40.025
Cc1cccc(c1)Cl	AL01058	338.4	18.789	53.068
Cc1cccc(c1)F	AL01059	339.02	17.779	46.768
ClCc1ccccc1	AL01061	361	19.392	49.562
Cc1cccc(c1)N(=O)=O	AL01062	380.8	19.384	45.868
O=N(=O)c1ccccc1C	AL01063	380.8	19.685	49.086
OC(=N)c1ccccc1	AL01064	364.1	18.989	45.928
COc1ccccc1O	AL01072	399.11	19.828	42.617
CSc1ccccc1	AL01075	428.3	20.396	45.144
SCc1ccccc1	AL01076	360.7	20.516	55.138
Cc1ccccc1N	AL01078	355.8	18.647	51.219
Cc1cccc(c1)N	AL01079	352.4	19.365	52.269
Cc1ccc(cc1)N	AL01080	347	19.484	50.524
NCc1ccccc1	AL01082	358	19.607	57.431
CCc1cccnc1	AL01083	364.49	19.915	45.154
Cc1sc(c(c1)C)C	AL01087	363	21.524	59.056
CCOC(=O)CC(=O)OCC	AL01091	554	26.533	72.532
CCC1=CCCC1	AL01092	355.7	19.863	55.655
CC1=C(C)CCC1	AL01095	351.34	20.084	46.528
CC1CCC(=C1)C	AL01096	361.41	20.049	57.031
CC1CC=C(C1)C	AL01097	365.1	19.904	53.551
CC1=CCCC1C	AL01098	361.41	19.446	53.254
CC1(C)CCC=C1	AL01099	347.65	19.111	51.033
C[C@H]1C=CC[C@H]1C	AL01100	360.73	19.313	56.389
C[C@H]1C=CC[C@@H]1C	AL01101	363.08	19.788	52.566
C[C@@H]1C=C[C@@H](C1)C	AL01102	354.03	19.952	45.432
C[C@H]1C=C[C@@H](C1)C	AL01103	354.03	19.802	48.168
CC(C#C)CCC	AL01105	401.65	20.469	47.065
CC(CC)CC#C	AL01106	402.66	20.392	60.374
C#CCCC(C)C	AL01107	396.29	20.506	64.089
CCC(C#CC)C	AL01108	409.03	21.127	51.449
CC#CCC(C)C	AL01109	400.65	21.67	66.304
CCC(C#C)CC	AL01110	397.96	20.439	56.124
CCC(C#C)(C)C	AL01111	384.21	20.58	60.819
CC(C(C)C)C#C	AL01112	391.93	20.597	56.142
C#CCC(C)(C)C	AL01113	382.87	19.989	51.471
C1CCC=CCC1	AL01114	332.01	19.133	53.669
CCC#CC(C)C	AL01115	408.36	21.516	60.446
C1CC2CC1CC2	AL01116	311	18.464	56.639
C=CC(=O)OCC(C)C	AL01117	474	22.681	58.815
C=COC(=O)C(C)(C)C	AL01118	443.1	22.909	62.151
CC(C(=O)C(C)C)C	AL01119	427	21.188	48.187
CCCCCC(=O)C	AL01120	448.6	22.893	68.255
CCCCC(=O)CC	AL01121	458	22.6	61.784
C[C@H]1CCC[C@H](C1)O	AL01122	385.3	20.34	62.896
C[C@@H]1CCC[C@@H](C1)O	AL01123	385.3	20.621	59.937
CCCCCC(=O)OC	AL01124	482.58	24.473	71.317
CCCC(=O)CCC	AL01125	452	23.398	61.829
CCCCCCC(=O)O	AL01128	480	23.125	62.255
CC(CCC([O])(C)[O-])C	AL01129	476.3	24.378	65.498
C[C@@H]1CC[C@H](C1)C	AL01135	366.81	20.37	54.785
CCCC/C=C\C	AL01136	423	22.002	60.574
CCCC/C=C/C	AL01137	423	21.917	49.281
CCC/C=C\CC	AL01138	424	22.313	58.847
CCC/C=C/CC	AL01139	424	22.744	62.519
CCCCC(=C)C	AL01140	418.4	21.259	50.958
CC(C=C)CCC	AL01141	420.8	21.393	57.304
CC(CC)CC=C	AL01142	421	21.053	65.833
C=CCCC(C)C	AL01143	415	21.388	54.685
CCCC=C(C)C	AL01144	399.75	21.77	57.524
CCC/C(=C\C)/C	AL01145	404.78	21.573	59.208
CCC/C(=C/C)/C	AL01146	404.11	21.607	56.765
C/C=C\C(CC)C	AL01147	413.13	22.026	60.543
C/C=C/C(CC)C	AL01148	397.03	22.047	58.091
C/C=C\CC(C)C	AL01149	406.09	21.709	56.978
C/C=C/CC(C)C	AL01150	391	22.016	64.02
CC/C=C\C(C)C	AL01151	408.1	22.1	59.062
CC/C=C/C(C)C	AL01152	390.66	22.086	53.271
CC/C=C(\CC)/C	AL01153	414.17	22.755	56.227
CC/C=C(/CC)\C	AL01154	409.14	22.546	61.784
CCCC(=C)CC	AL01155	420	21.206	55.24
CCC(C=C)CC	AL01156	415	21.677	48.626
CCC(C(=C)C)C	AL01157	394.11	20.899	53.509
CC(CC(=C)C)C	AL01158	399.15	20.847	48.857
CCC(C=C)(C)C	AL01159	378.25	20.346	54.989
C=CC(C(C)C)C	AL01160	398.78	20.79	57.119
CCC(=CC)CC	AL01161	408.47	21.239	49.23
C=CCC(C)(C)C	AL01162	354.1	20.534	63.198
CCC(=C(C)C)C	AL01163	422.05	21.515	55.083
CC(C=C(C)C)C	AL01164	393.18	21.194	59.883
C/C=C(\C(C)C)/C	AL01165	408.6	21.072	56.225
C/C=C/C(C)(C)C	AL01167	346.79	21.813	55.942
CCC(=C)C(C)C	AL01168	398.14	21.432	57.728
CC(=C)C(C)(C)C	AL01169	380.4	20.654	53.223
C/C=C(/C(C)C)\C	AL01170	398.37	21.072	56.225
CCCCCCCBr	AL01171	496.4	24.742	72.156
CCCCCCCF	AL01172	463.62	23.333	69.778
CNC1CCCCC1	AL01173	377	21.828	66.337
CCCCC[C@H](O)C	AL01174	466	23.981	75.643
CCCC[C@@H](CC)O	AL01175	471.5	23.503	70.298
CCC(CC)(CC)O	AL01178	440.69	22.821	60.656
OC(C(C)C)C(C)C	AL01179	450.98	22.737	61.336
CCC[C@H](CC)C	AL01189	406.71	22.835	57.549
c1ccc2c(c1)[nH]cc2	AL01194	328	19.218	49.435
CC(=O)c1ccccc1	AL01195	384.5	20.111	60.286
CC(=O)Oc1ccccc1	AL01196	430.3	21.846	49.732
COC(=O)c1ccccc1O	AL01198	456	21.982	55.474
C=Cc1ccccc1	AL01199	345.1	18.813	49.869
C1=CC=CC=CC=C1	AL01200	326.8	18.933	40.103
O=Cc1cccc(c1)C	AL01204	394.8	19.333	45.212
Cc1c(C)cccc1Cl	AL01207	384.7	21.014	58.799
Clc1ccc(c(c1)C)C	AL01208	384.7	21.389	62.042
Cc1ccc(c(c1)O)C	AL01210	395.76	20.516	57.889
Cc1cccc(c1O)C	AL01211	389.72	20.377	55.233
Oc1ccc(c(c1)C)C	AL01212	391.16	19.998	50.017
CC(c1ccccc1)O	AL01215	402.7	20.848	56.359
CCc1ccccc1O	AL01216	392.38	20.308	52.425
CCOc1ccccc1	AL01217	402	21.627	59.072
OCCc1ccccc1	AL01218	405	21.492	44.866
CCc1ccc(cc1)O	AL01220	390.54	21.346	57.177
Cc1c(C)cccc1O	AL01221	390.08	20.433	53.368
Cc1ccc(c(c1)C)N	AL01225	393.5	21.201	62.013
CCNc1ccccc1	AL01229	352	21.79	57.842
CCc1ccccc1N	AL01231	402	21.411	48.279
C1CC=CCCC=C1	AL01235	350.51	20.783	54.551
CCCCC#CCC	AL01243	439.37	24.589	67.54
CCC(C#C)(CC)C	AL01244	442.08	22.794	60.105
C1CCCC=CCC1	AL01245	351.23	21.227	45.56
CCCCCCC(=O)C	AL01246	496.2	25.66	72.913
CCCCCCCC(=O)O	AL01247	520	27.271	73.524
CC(CC(OC(=O)C)C)C	AL01248	522.07	27.266	74.837
CC(COC(=O)C(C)C)C	AL01252	510	25.729	60.306
CCOCCOCCOC(=O)C	AL01253	611	30.164	79.001
CCC1(C)CCCC1	AL01255	401	22.11	60.188
CC[C@H]1CCC[C@H]1C	AL01256	374.84	22.187	64.587
CC[C@@H]1CCC[C@H]1C	AL01257	374.84	22.596	60.062
CC[C@H]1CC[C@H](C1)C	AL01258	374.84	23.018	66.871
CC[C@H]1CC[C@@H](C1)C	AL01259	374.84	22.695	58.429
CC1CCCC1(C)C	AL01260	387.3	21.561	54.45
CC1CCC(C1)(C)C	AL01261	387.3	22.155	61.452
CC1[C@H](C)CC[C@H]1C	AL01263	390.5	22.063	61.878
C[C@@H]1C[C@H]([C@H](C1)C)C	AL01266	390.5	22.09	60.221
CCC1CCC(C1)C	AL01268	362.9	23.071	64.088
C[C@@H]1CCCC[C@@H]1C	AL01271	374.51	22.013	66.338
C[C@H]1CCCC[C@@H]1C	AL01272	370.91	21.947	59.582
C[C@@H]1CCC[C@@H](C1)C	AL01273	370.45	22.401	64.642
C[C@H]1CCC[C@@H](C1)C	AL01274	376.23	21.871	51.438
C[C@@H]1CC[C@@H](CC1)C	AL01275	370.45	21.742	61.919
C[C@@H]1CC[C@H](CC1)C	AL01276	364.8	21.503	64.846
CCCCC/C=C\C	AL01278	462.1	24.479	59.539
CCCCC/C=C/C	AL01279	462	24.478	73.213
CCCC/C=C\CC	AL01280	463.7	24.663	71.494
CCCC/C=C/CC	AL01281	464	24.748	70.344
CCC/C=C\CCC	AL01282	458	24.401	75.258
CCC/C=C/CCC	AL01283	458	25.087	58.338
CCCCCC(=C)C	AL01284	457.8	23.853	72.767
CC(C=C)CCCC	AL01285	446.79	23.93	63.21
CCC[C@H](CC=C)C	AL01286	431	23.722	54.492
CC(CC)CCC=C	AL01287	457.18	23.707	67.707
C=CCCCC(C)C	AL01288	454.4	23.854	64.89
CCCCC=C(C)C	AL01289	438.17	24.524	66.779
CCCC/C(=C\C)/C	AL01290	442.53	24.434	65.659
CCCC/C(=C/C)/C	AL01291	442.53	25.044	65.145
CCCC(/C=C\C)C	AL01292	451.55	23.982	70.543
CCCC(/C=C/C)C	AL01293	434.78	25.146	53.427
C/C=C/CC(CC)C	AL01294	439.47	23.887	59.545
C/C=C\CCC(C)C	AL01295	451.55	24.545	74.838
C/C=C/CCC(C)C	AL01296	434.78	24.783	63.679
CCC=CCC(C)C	AL01297	444.14	24.526	54.848
CCC/C=C/C(C)C	AL01298	445.85	23.993	63.886
CCC/C=C\C(C)C	AL01299	429.08	24.005	68.413
CCC/C=C(\CC)/C	AL01300	442.53	25.084	53.638
CCC/C=C(/CC)\C	AL01301	442.53	24.643	57.188
CCC/C(=C\CC)/C	AL01302	442.53	24.111	55.342
CCC/C(=C/CC)/C	AL01303	442.53	24.326	52.73
CC/C=C\C(CC)C	AL01304	451.55	24.84	75.612
CC/C=C/C(CC)C	AL01305	434.78	24.591	61.401
CC/C=C\CC(C)C	AL01306	475.03	24.357	62.587
CC/C=C/CC(C)C	AL01307	429.08	24.526	54.848
CCCCC(=C)CC	AL01308	459	24.139	63.156
CCCC(C=C)CC	AL01309	428	23.3	65.731
CCC(CC=C)CC	AL01310	458.19	23.564	52.385
CCCC(C(=C)C)C	AL01311	452.4	23.121	63.331
CCC(CC(=C)C)C	AL01312	437.56	23.452	69.769
CC(CCC(=C)C)C	AL01313	423.81	22.972	62.232
CCCC(C=C)(C)C	AL01314	416.67	22.427	60.504
CCC(C(C=C)C)C	AL01315	445.91	23.038	62.856
C=CC(CC(C)C)C	AL01316	432.83	23.403	72.327
CCC(CC=C)(C)C	AL01317	405.93	22.848	49.188
C=CCC(C(C)C)C	AL01318	445.91	23.085	63.251
CCC/C(=C\C)/CC	AL01320	446.89	24.416	69.88
CCC/C(=C/C)/CC	AL01321	446.89	24.07	73.829
C/C=C\C(CC)CC	AL01322	440.48	24.455	63.267
C/C=C/C(CC)CC	AL01323	440.48	24.273	66.228
CCCC(=C(C)C)C	AL01324	460.47	23.585	66.266
CCC(C=C(C)C)C	AL01325	441.32	23.523	56.033
CC(CC=C(C)C)C	AL01326	417.17	24.457	69.569
CCC(/C(=C\C)/C)C	AL01327	435.95	23.622	55.394
CCC(/C(=C/C)/C)C	AL01328	435.95	23.562	62.569
C/C=C(\CC(C)C)/C	AL01329	430.59	24.257	61.86
C/C=C(/CC(C)C)\C	AL01330	430.59	23.997	67.643
C/C=C/C(CC)(C)C	AL01331	404.66	23.692	52.765
C/C=C\C(C(C)C)C	AL01332	441.96	23.63	64.45
C/C=C/C(C(C)C)C	AL01333	425.19	23.737	53.793
C/C=C\CC(C)(C)C	AL01334	393.93	23.427	65.18
CCC=C(CC)CC	AL01336	446.89	24.425	67.711
CC/C=C\C(C)(C)C	AL01337	452.29	23.224	62.506
CC/C=C/C(C)(C)C	AL01338	390.24	24.288	73.756
CC/C=C(\C(C)C)/C	AL01339	430.25	23.83	63.55
CC/C=C(/C(C)C)\C	AL01340	430.25	24.032	54.74
CC/C(=C/C(C)C)/C	AL01341	439.98	24.179	68.421
CC(/C=C\C(C)C)C	AL01342	434.91	23.645	63.012
CC(/C=C/C(C)C)C	AL01343	408.08	24.337	66.831
CC/C(=C(\CC)/C)/C	AL01344	464.83	23.409	64.715
CC/C(=C(/CC)\C)/C	AL01345	464.83	23.649	63.4
CCCC(=C)CCC	AL01346	458.86	24.419	64.2
CCCC(=C)C(C)C	AL01347	449.33	23.355	63.623
CCC(=C)C(CC)C	AL01348	446.95	22.671	65.163
CCC(=C)CC(C)C	AL01349	431.52	23.822	62.88
CCC(C(=C)C)CC	AL01350	440.58	23.668	56.134
CCC(C=C)(CC)C	AL01351	431.09	22.44	59.393
CCC(C(C)C)C=C	AL01352	442.89	23.259	62.222
CCC(C(=C)C)(C)C	AL01353	422.54	22.06	57.485
CC(C(C(=C)C)C)C	AL01354	422.54	22.88	56.164
CC(=C)CC(C)(C)C	AL01355	406	22.568	59.292
C=CC(C(C)C)(C)C	AL01356	425.86	22.601	58.441
C=CC(C(C)(C)C)C	AL01357	399.69	22.843	64.9
CCC(=C(C)C)CC	AL01358	470.53	22.972	62.743
CC/C(=C/C)/C(C)C	AL01359	464.46	23.377	70.567
CC/C(=C\C)/C(C)C	AL01360	467.48	23.64	52.056
CC(C(=C(C)C)C)C	AL01361	466.64	23.325	60.485
CC(=CC(C)(C)C)C	AL01362	409	23.167	65.601
C/C=C(/C(C)(C)C)\C	AL01364	411.53	23.746	60.298
CC(C(=C)C(C)C)C	AL01365	439.81	23.152	61.096
CCC(=C)C(C)(C)C	AL01366	419.99	22.425	54.631
CC/C(=C\C(C)C)/C	AL01367	439.98	24.913	63.169
CCCCCCCCCl	AL01368	455.46	27.351	83.763
CCCCCCCCBr	AL01369	518.67	27.757	62.116
CCCCCCCCF	AL01370	503.44	26.389	76.234
CCCCCCCCO	AL01373	518.7	26.606	84.887
CCCC[C@H](CO)CC	AL01374	497	25.909	60.616
CCCCCC[C@H](O)C	AL01375	513.2	26.04	68.256
CCCCOCCCC	AL01379	501.4	27.643	62.69
CC(SSC(C)(C)C)(C)C	AL01381	500.1	28.56	70.791
CC(SC(C)(C)C)(C)C	AL01382	528.3	25.04	69.136
CCCCSCCCC	AL01383	527	29.28	77.812
CCOCCOCCOCC	AL01384	585	31.008	75.609
COCCOCCOCCOC	AL01385	622	31.934	88.114
CCCCNCCCC	AL01401	508	28.04	65.911
c1ccc2c(c1)cncc2	AL01404	365.2	20.242	50.186
c1ccc2c(c1)nccc2	AL01405	365.6	20.226	50.005
Oc1cccc2c1nccc2	AL01406	396	20.878	48.037
c1ccc2c(c1)C=CC2	AL01410	336.87	19.754	52.261
CCOC(=O)c1ccccc1	AL01415	455	24.359	59.95
C1Cc2c(C1)cccc2	AL01417	348.91	21.053	63.958
C/C=C\c1ccccc1	AL01418	383.7	21.159	62.84
C=CCc1ccccc1	AL01419	412.76	21.618	58.61
C=Cc1cccc(c1)C	AL01420	389.5	21.692	57.571
C=Cc1ccccc1C	AL01421	383.7	21.568	56.401
CC=Cc1ccccc1	AL01422	392.63	21.774	59.605
C/C=C/c1ccccc1	AL01423	380.3	22.012	50.286
N[C@H](C(=O)O)Cc1ccccc1	AL01424	487.9	24.072	61.139
CC(c1ccccc1O)C	AL01427	417.1	22.734	49.607
OCCCc1ccccc1	AL01428	446.9	24.193	63.554
CCc1ccccc1C	AL01430	399.2	22.891	61.068
CCc1cccc(c1)C	AL01431	404.2	22.918	60.931
CCC(c1ccccc1)O	AL01435	442.2	23.011	63.72
CCCCCCC#CC	AL01442	478.32	26.845	66.548
CCCCCC#CCC	AL01443	478.32	27.037	73.394
CCCCC#CCCC	AL01444	481.21	27.436	67.477
CCC#CCCC(C)C	AL01445	481.21	26.965	71.844
CC(CC#CC(C)C)C	AL01446	481.21	26.846	73.667
CCCCCCCCC(=O)O	AL01447	559	29.445	81.405
CC(CC(=O)CC(C)C)C	AL01449	509	27.315	76.39
CCCCC(=O)CCCC	AL01450	530.72	28.155	86.316
CCCCCCCC(=O)OC	AL01451	572.96	30.077	90.815
CC(CC1CCCC1)C	AL01453	446.63	25.034	66.902
CCC(C1CCCC1)C	AL01454	446.63	24.05	52.221
CC(C1CCCC1)(C)C	AL01455	417.28	23.525	55.58
CCC[C@@H]1CCC[C@@H]1C	AL01457	413.79	24.362	65.108
CCC[C@H]1CCC[C@@H]1C	AL01458	413.79	24.796	67.987
CCC[C@@H]1CC[C@@H](C1)C	AL01459	413.79	25.447	66.224
CCC[C@H]1CC[C@@H](C1)C	AL01460	413.79	25.256	69.031
CC([C@H]1CCC[C@H]1C)C	AL01462	404.27	24.014	78.548
CC([C@@H]1CCC[C@H]1C)C	AL01463	404.27	23.982	71.8
C[C@@H]1CC[C@@H](C1)C(C)C	AL01464	404.27	25.026	74.24
C[C@@H]1CC[C@H](C1)C(C)C	AL01465	404.27	24.766	69.362
CC[C@@H]1CCC[C@@H]1CC	AL01467	413.79	24.05	63.674
CC[C@H]1CCC[C@@H]1CC	AL01468	413.79	24.368	56.105
CC[C@@H]1CC[C@@H](C1)CC	AL01469	413.79	24.935	68.429
CC[C@H]1CC[C@@H](C1)CC	AL01470	413.79	25.47	62.605
CCCCCCCCCBr	AL01477	557.62	30.214	84.356
CCCCCCCCCF	AL01478	542.93	29.351	84.892
Brc1cccc2c1cccc2	AL01483	386	22.356	56.269
Clc1cccc2c1cccc2	AL01484	375	22.182	57.762
Clc1ccc2c(c1)cccc2	AL01485	376.45	22.386	57.084
c1ccc2-c(cc1)ccc2	AL01487	338.63	21.19	46.861
Cc1nccc2c1cccc2	AL01491	338.47	21.804	55.962
Cc1ccc2c(n1)cccc2	AL01492	350	22.224	58.395
C=Cc1ccc(cc1)C=C	AL01494	400.5	23.272	60.056
CC1C=Cc2c1cccc2	AL01495	374.5	22.326	55.652
CC1=Cc2c(C1)cccc2	AL01496	379.6	22.165	62.519
C1CCc2c(C1)cccc2	AL01497	369.64	22.706	58.999
CC(c1ccccc1)(C)C	AL01500	395.9	23.646	56.875
Oc1ccccc1C(C)(C)C	AL01501	426.71	24.707	65.558
CC(c1ccc(c(c1)O)C)C	AL01502	449.88	25.256	61.082
O=C1CC2C(C1(C)CC2)(C)C	AL01506	391	23.69	66.2
C1CC[C@H]2[C@@H](C1)CCCC2	AL01509	374.55	24.338	73.515
CCCC[C@@H](COC(=O)C)CC	AL01511	605	31.689	82.232
CCCCCCCCCCBr	AL01512	596.57	32.731	98.913
CCCCCCCCCCF	AL01513	582.76	31.429	93.072
CC(CCOCCC(C)C)C	AL01515	581.19	31.21	71.664
CCCCCOCCCCC	AL01516	585	33.553	85.932
CCCCCCCCCCO	AL01517	597.1	32.253	96.334
CCCCCCCCCCS	AL01518	611.6	34.568	92.276
CCCCCCCCCCC#N	AL01526	566.07	33.611	89.942
CCCCCCCCCC(=O)OC	AL01527	634.4	36.186	97.365
CCCCCCCCCCCF	AL01528	622.24	34.48	97.042
CCCCCCCCC(C)C	AL01530	582.43	33.739	86.412
c1cc2cccc3c2c(c1)CC3	AL01541	368.9	24.48	64.103
c1ccc(cc1)Oc1ccccc1	AL01542	413	27.572	70.593
C1CCC(CC1)c1ccccc1	AL01551	422.4	26.958	76.537
CCCCCCCCCCCC#N	AL01553	604.78	36.164	105.681
CCCCCCCCCCCCBr	AL01554	692.2	38.133	112.37
CCCCCCCCCCCCF	AL01555	662.07	36.61	95.154
CCCCCCCCCCCCO	AL01557	675.5	37.726	92.043
CCCCCCCCCCCCS	AL01558	690.1	39.839	123.634
c1ccc2c(c1)nc1c(c2)cccc1	AL01559	393.6	26.039	66.643
c1ccc2-c3c(Cc2c1)cccc3	AL01561	381.5	25.772	62.593
O=C(c1ccccc1)c1ccccc1	AL01562	440	27.417	76.614
c1ccc2c(c1)cc1c(c2)cccc1	AL01570	392.6	27.098	55.099
c1ccc2c(c1)c1ccccc1cc2	AL01571	394.5	26.689	74.716
CCCCCCCCCCCCCCF	AL01572	741.38	42.566	125.129
c1cc2ccc3c4c2c(c1)ccc4ccc3	AL01575	402	27.766	59.945
c1ccc2-c3c4c(-c2c1)cccc4ccc3	AL01576	418.5	28.75	72.618
FC(C(F)(F)F)(Cl)F	GH0001	357.73	13.759	36.022
FC(=C(F)F)Cl	GH0002	321.77	11.341	32.497
N#CC(F)(F)F	GH0003	297.77	9.789	24.659
N#CC(Cl)(Cl)Cl	GH0004	336.74	14.164	41.66
N#CC#N	GH0005	241.83	7.888	22.455
ClC(=C(Cl)Cl)Cl	GH0006	340.75	15.534	37.805
FC(=C(F)F)Br	GH0007	334.77	12.811	28.956
FC(C(F)(F)F)(Cl)Cl	GH0008	366.76	14.895	32.971
ClC(C(Cl)(Cl)Cl)(Cl)Cl	GH0009	397.7	18.666	53.972
FC(C(F)(F)F)(F)F	GH0010	333.77	11.533	30.322
ClC(C(Cl)(Cl)F)(Cl)Cl	GH0011	391.72	18.216	49.446
FC(C(Cl)(Cl)F)(Cl)Cl	GH0012	385.74	17.046	50.131
ClC(C(Cl)(F)F)(Cl)Cl	GH0013	380.72	16.95	46.644
FC(=C(F)F)F	GH0014	299.78	9.828	24.015
ClC(=O)C(Cl)(Cl)Cl	GH0015	364.75	16.422	38.492
NO	GH0018	235.85	6.707	20.467
FC(Br)(F)F	GH0019	296.77	11.48	32.355
O=C=O	GH0020	213.86	5.261	14.566
[C]=S	GH0021	210.85	7.398	20.015
[C]=O	GH0022	197.84	4.808	9.53
ClC(Cl)(Cl)Cl	GH0023	309.77	14.013	45.208
FC(F)(F)F	GH0024	261.81	8.091	22.004
FC(=O)F	GH0025	258.8	6.956	23.025
FC(Cl)(F)F	GH0026	284.81	9.938	24.226
ClC#N	GH0027	235.85	7.84	25.01
FC#N	GH0028	224.85	5.988	17.297
FC(Br)(Br)F	GH0029	324.78	13.889	41.964
FC(Cl)(Cl)F	GH0030	300.78	11.629	28.92
FC(Cl)(Cl)Cl	GH0031	309.77	12.841	38.312
S=C=S	GH0032	237.82	11	24.464
ClC(Br)(Cl)Cl	GH0033	332.77	15.043	38.95
O=C=S	GH0034	231.84	8.307	21.958
BrC#N	GH0035	247.81	9.47	16.176
FC(Br)(Cl)F	GH0036	317.76	12.762	36.074
ClC(=O)Cl	GH0037	283.81	10.21	26.774
FC(Br)Cl	GH0038	303.79	12.654	29.913
FC(Cl)F	GH0039	280.8	9.577	28.433
FC(Cl)Cl	GH0040	292.8	11.051	29.026
FC=O	GH0041	246.8	6.746	20.497
C#N	GH0042	201.86	5.635	19.299
N=C=O	GH0043	237.82	6.723	15.09
BrC(Br)Br	GH0044	330.76	15.953	51.546
ClC(Cl)Cl	GH0045	295.81	12.424	38.224
FC(F)F	GH0046	259.81	8.105	23.406
N=C=S	GH0047	247.81	9.622	23.363
FC(Br)F	GH0048	294.8	11.259	30.442
C=O	GH0049	224.85	6.542	19.725
ClCBr	GH0050	286.77	12.093	29.415
FCCl	GH0051	263.82	9.206	26.763
[N-]=[N+]=C	GH0052	242.83	8.046	24.795
BrCBr	GH0053	292.8	12.917	33.317
ClCCl	GH0054	269.8	11.093	28.246
FCF	GH0055	246.8	7.661	22.183
OC=O	GH0056	248.81	7.478	19.179
CBr	GH0057	244.84	10.279	31.679
CCl	GH0058	233.84	8.823	26.308
CF	GH0059	222.85	7.495	19.969
NC=O	GH0060	248.81	8.639	19.518
[O-][N+](=O)C	GH0061	277.79	9.497	21.725
CON=O	GH0063	284.81	9.772	28.599
[O-][N+](=O)OC	GH0064	303.79	10.698	31.027
CS(=O)(=O)Cl	GH0065	312.78	12.953	34.75
CS	GH0067	254.83	10.26	29.252
CO	GH0068	239.82	7.84	19.888
COO	GH0069	278.79	9.432	28.16
NC(=O)N	GH0070	266.79	10.148	23.584
NC(=S)N	GH0072	302.79	12.732	25.851
CN	GH0073	242.83	8.737	21.833
FC(C(Cl)(Cl)Cl)(F)F	GH0076	369.73	15.745	45.88
FC(C(Cl)(F)F)(Cl)Cl	GH0077	386.74	15.756	46.903
FC(C(Cl)(F)F)(Cl)F	GH0078	363.75	14.664	40.699
BrC#C	GH0079	253.83	10.624	27.237
ClC#C	GH0080	241.83	8.995	17.186
FC#C	GH0081	231.84	7.142	16.867
ClC(C(Cl)(Cl)Cl)Cl	GH0082	381.73	17.753	49.585
ClC=C(Cl)Cl	GH0083	324.78	13.825	38.396
OC(=O)C(F)(F)F	GH0084	332.77	10.992	27.584
FC=C(F)F	GH0085	291.79	9.784	28.497
ClC=C(F)F	GH0086	302.79	11.158	20.599
FC(OC(F)(F)F)F	GH0087	336.74	12.377	36.711
ClC(C(F)(F)F)Br	GH0088	365.75	15.637	48.036
FC(C(F)(F)F)F	GH0089	331.76	11.606	28.909
FC(C(F)(F)F)Cl	GH0090	348.74	12.988	36.095
O=CC(Cl)(Cl)Cl	GH0091	348.74	14.613	42.159
ClC(C(F)(F)F)Cl	GH0092	352.75	14.185	45.235
FC(C(Cl)(F)F)Cl	GH0093	357.73	14.402	38.998
FCC(F)(F)F	GH0094	316.75	11.281	28.091
BrC(C(Br)Br)Br	GH0095	399.7	20.083	56.167
ClC(C(Cl)Cl)Cl	GH0096	359.73	16.62	47.026
ClC(=C)Cl	GH0097	288.78	12.466	31.271
FC(=C)F	GH0098	265.83	9.435	23.374
ClCC(=O)Cl	GH0099	325.78	13.351	38.05
Cl/C=C\Cl	GH0100	289.79	12.473	31.274
F/C=C\F	GH0101	268.8	9.441	22.295
O=CC=O	GH0102	271.81	9.102	21.606
C=C=O	GH0103	245.84	7.887	25.908
Cl/C=C/Cl	GH0104	289.79	12.473	29.408
C#C	GH0105	200.86	7.024	21.207
ClC(C(=O)O)Cl	GH0106	341.75	13.686	32.479
ClCC(Cl)(Cl)Cl	GH0107	355.76	16.602	41.094
FC(C(F)F)F	GH0108	319.76	11.127	31.852
FCC(Cl)(Cl)Cl	GH0109	349.74	15.37	49.195
NC(=O)C(F)(F)F	GH0110	313.78	12.037	26.615
ClCC(F)(F)F	GH0111	326.75	12.606	29.6
CC(Cl)(Cl)Cl	GH0112	320.77	15.039	37.207
CC(F)(F)F	GH0113	281.8	10.838	28.964
ClCC(Cl)Cl	GH0114	335.78	14.865	43.369
CC(Cl)(F)F	GH0115	306.76	12.459	30.592
CC#N	GH0116	242.83	9.111	22.449
BrC=C	GH0117	275.82	11.679	33.039
ClC=C	GH0118	270.8	10.687	31.708
FC=C	GH0119	256.8	9.195	29.258
CN=C=O	GH0120	270.8	10.246	25.035
[O-][N+](=O)C=C	GH0121	299.78	10.982	30.9
CC(=O)Cl	GH0122	294.8	11.467	23.006
[C-]#[N+]C	GH0123	246.8	9.682	27.623
FCC(F)F	GH0124	310.77	10.749	30.701
ClCC=O	GH0125	303.79	11.215	29.511
CC(Cl)(Cl)F	GH0126	318.76	13.717	33.886
COC(=O)Cl	GH0127	311.78	12.551	28.732
CC(Cl)Cl	GH0129	304.79	13.457	36.771
CC(F)F	GH0130	282.8	10.49	30.232
BrCCBr	GH0131	329.76	15.865	39.795
ClCCCl	GH0132	307.76	13.325	30.577
FCCF	GH0133	288.78	10.725	30.324
CC(Cl)F	GH0134	300.78	12.214	33.449
CC=O	GH0135	263.82	9.724	23.742
CC(=O)O	GH0136	282.8	10.308	22.969
O1CC1	GH0137	242.83	9.405	27.121
COC=O	GH0138	290.79	10.843	27.016
C=C	GH0139	218.83	8.771	25.306
CC(Br)Br	GH0141	327.75	15.823	40.953
COC(F)F	GH0142	291.79	12.013	34.555
S1CC1	GH0143	254.83	11.58	30.892
OCCCl	GH0144	320.77	12.846	30.815
CC(=O)N	GH0145	277.79	11.098	30.974
CCBr	GH0146	286.77	13.064	35.833
CCCl	GH0147	275.82	11.862	28.907
N1CC1	GH0148	250.82	10.08	26.14
CCF	GH0149	264.82	10.421	25.653
NCC(=O)O	GH0150	329.76	12.272	34.886
[O-][N+](=O)CC	GH0151	317.76	12.704	37.252
CNC=O	GH0152	280.8	11.644	32.582
CCS(=O)(=O)Cl	GH0154	340.75	15.409	45.112
SCCS	GH0155	344.77	15.614	41.829
CSSC	GH0156	335.78	16.544	45.855
CSC	GH0157	285.81	13.196	36.525
CS(=O)(=O)C	GH0158	310.77	13.737	32.321
CS(=O)C	GH0159	305.8	13.188	29.516
CC	GH0160	228.83	9.851	24.319
CCS	GH0161	293.8	13.247	29.381
CCO	GH0162	280.8	10.993	26.026
OCCO	GH0163	303.79	11.952	27.707
COC	GH0164	266.79	10.973	30.955
CCOS(=O)(=O)O	GH0165	359.73	15.89	42.433
COS(=O)(=O)OC	GH0166	334.77	16.535	51.853
OCCS	GH0168	325.78	13.678	39.031
CNC(=O)N	GH0169	305.8	13.275	28.941
NCCO	GH0170	319.76	12.289	33.493
CNC	GH0171	271.81	11.737	33.103
CCN	GH0172	283.81	11.641	28.743
NCCN	GH0174	321.77	13.261	37.233
O=C(C(F)(F)F)C(F)(F)F	GH0176	392.72	13.963	35.058
FC(C(F)(F)F)(C(F)(F)F)F	GH0177	413.71	14.867	45.369
FC(=C(OC(F)(F)F)F)F	GH0178	390.71	14.857	29.255
FC(C(F)(F)F)C(F)(F)F	GH0179	393.72	14.83	44.174
c1ncco1	GH0180	270.8	10.979	26.105
C=CC#N	GH0181	273.81	10.935	25.257
ClCC#C	GH0182	287.78	12.345	30.396
FC(CC(F)(F)F)F	GH0183	382.73	14.129	40.334
FCC(C(F)F)(F)F	GH0184	383.73	14.281	41.205
FC(C(F)(F)C)(F)F	GH0185	356.76	14.116	32.706
C=C=C	GH0186	243.84	10.286	35.05
C1COC1=O	GH0187	285.81	11.815	33.84
O=C1OCCO1	GH0188	276.78	12.545	30.008
C=CC=O	GH0189	288.78	10.998	30.611
CC#C	GH0190	247.81	10.284	24.854
C=COC=O	GH0191	304.79	12.742	29.154
OCC#C	GH0192	292.8	11.141	32.956
ClC/C=C/Cl	GH0193	337.74	15.181	47.607
ClC/C=C\Cl	GH0194	337.74	15.708	41.433
ClCC(CCl)Cl	GH0195	382.73	17.407	52.196
CC(=C)Br	GH0196	345.77	14.43	31.727
CC(=C)Cl	GH0197	295.81	13.135	35.65
BrCC=C	GH0198	316.75	14.25	46.424
ClCC=C	GH0199	306.76	13.497	38.751
C/C=C\F	GH0200	297.77	11.861	27.456
C/C=C/F	GH0201	297.77	11.742	27.373
CC(=C)F	GH0202	295.81	11.997	32.047
FCC=C	GH0203	299.78	12.092	33.328
OCCC#N	GH0204	330.76	13.128	36.708
CCC#N	GH0205	284.81	12.182	37.971
C/C=C\Cl	GH0206	299.78	13.44	39.221
C/C=C/Cl	GH0207	299.78	13.371	38.79
NC(=O)C=C	GH0208	300.78	12.983	34.494
COC(=O)CCl	GH0209	372.74	15.863	45.161
C/C=C/Br	GH0210	304.79	14.836	40.75
C/C=C\Br	GH0211	317.76	14.809	35.871
BrCC(Br)C	GH0212	376.75	18.172	48.792
FCC(F)C	GH0213	324.78	13.328	32.491
ClCC(Cl)C	GH0214	354.76	15.853	45.61
O1COCOC1	GH0215	286.77	13.777	38.665
ClCCCCl	GH0216	367.72	15.83	45.65
CC(=O)C	GH0217	294.8	12.364	37.281
COC(=O)OC	GH0218	321.77	15.258	40.552
CCOC=O	GH0219	327.75	13.418	31.176
COC(=O)C	GH0220	322.77	13.946	36.792
C[C@@H]1CO1	GH0221	286.77	12.465	34.484
C1CCO1	GH0222	264.82	12.381	29.697
CCC=O	GH0223	304.79	12.77	34.138
CCC(=O)O	GH0224	309.77	12.937	30.765
CC=C	GH0225	266.79	11.412	27.25
C1SCCS1	GH0226	322.77	16.379	36.852
CC(Cl)(Cl)C	GH0227	324.78	15.154	44.662
OCC=C	GH0228	307.76	12.544	29.384
COC=C	GH0229	307.76	13.146	29.138
C1CC1	GH0230	237.82	11.432	31.851
CC(=O)CO	GH0231	342.76	13.123	37.119
OCC1CO1	GH0232	321.77	12.787	36.51
ClCC(CCl)O	GH0233	402.71	16.367	37.005
OCC(CCl)Cl	GH0234	395.73	16.611	47.722
CC1CO1	GH0235	286.77	12.327	34.763
CCCBr	GH0236	330.76	15.655	45.731
CCCCl	GH0237	316.75	14.56	45.456
CCCF	GH0238	303.79	13.055	40.216
CC(Br)C	GH0239	315.79	15.164	43.437
CC(Cl)C	GH0240	305.8	14.019	46.074
CC(F)C	GH0241	292.8	12.65	34.461
CC([N+](=O)[O-])C	GH0242	343.76	15.001	33.388
NCC=C	GH0243	311.78	13.408	33.044
NC1CC1	GH0244	284.81	12.811	30.768
CC(O[N+](=O)[O-])C	GH0245	373.74	16.091	48.453
CNC(=O)C	GH0246	319.76	14.383	39.137
O=CN(C)C	GH0247	325.78	13.405	34.426
OCCCCl	GH0248	362.74	15.404	37.516
[O-][N+](=O)CCC	GH0249	349.74	15.095	41.727
OCC(CCl)O	GH0250	407.69	15.71	43.269
CC(CCl)O	GH0251	364.75	14.894	41.559
OCCCO	GH0252	357.73	14.63	34.636
CCCO	GH0253	322.77	13.594	32.346
CC(S)C	GH0254	323.78	15.311	42.231
CC(O)C	GH0255	311.78	13.08	37.006
COCOC	GH0256	335.78	15.547	38.234
COCC	GH0257	308.77	14.135	38.479
CCC	GH0258	269.8	12.679	30.773
COCCO	GH0259	358.73	14.746	34.024
CCCS	GH0260	336.74	15.925	44.891
OCC(O)C	GH0261	313.78	14.149	34.53
OC[C@@H](O)C	GH0262	307.76	14.347	35.586
OC[C@H](O)C	GH0263	307.76	14.224	33.215
CSCC	GH0264	332.77	15.846	43.297
CNC(=O)NC	GH0265	344.77	16.341	44.478
C[C@H](CN)O	GH0266	362.74	14.812	33.501
CNCC	GH0268	335.78	14.836	34.338
CCCN	GH0269	324.78	14.248	38.771
CC(N)C	GH0270	311.78	13.833	39.218
CN(C)C	GH0272	287.78	14.217	38.607
NCCCO	GH0273	366.76	15.231	37.554
NCCCN	GH0276	366.76	16.018	43.34
ClC(=C(Cl)Cl)C(=C(Cl)Cl)Cl	GH0277	465.68	23.552	67.186
FC(=C(F)F)C(=C(F)F)F	GH0278	372.74	14.919	42.578
F/C(=C(\C(F)(F)F)/F)/C(F)(F)F	GH0279	433.7	16.537	41.966
FC1(F)C(F)(F)C(C1(F)F)(F)F	GH0280	400.71	16.072	37.884
O=C1C=CC(=O)O1	GH0281	316.75	12.311	29.964
C#CC#C	GH0282	249.81	10.354	25.821
C=CC#C	GH0283	279.79	11.68	33.867
C=C1CC(=O)O1	GH0284	305.8	13.517	36.943
c1ccco1	GH0285	266.79	12.488	39.788
c1ccncn1	GH0286	281.8	13.371	34.707
N#CCCC#N	GH0287	326.75	14.048	39.492
F/N=N/F	GH0288	262.82	7.355	21.651
F/N=N\F	GH0289	259.81	7.172	17.543
O=N[N+](=O)[O-]	GH0290	310.77	8.042	18.925
[O-][N+]=O	GH0291	239.82	4.997	13.307
ClN(Cl)Cl	GH0292	296.77	11.509	36.568
FN(F)F	GH0293	260.81	6.99	17.951
BrN=O	GH0294	273.81	8.679	16.602
ClN=O	GH0295	261.81	7.22	17.746
FN=O	GH0296	247.81	5.07	13.969
[O-][N+]#N	GH0297	219.84	5.529	13.168
[O-][N+](=O)F	GH0298	259.81	6.484	20.393
[O-][N+](=O)Cl	GH0299	271.81	8.34	20.068
F[Cl](=O)(=O)=O	GH0300	278.79	9.608	27.924
O=S=O	GH0301	247.81	6.419	16.37
FSF	GH0302	257.8	7.102	17.488
O=S(=O)=O	GH0303	256.8	7.156	17.897
FS(F)(F)(F)(F)F	GH0304	291.79	10.45	29.55
FS(F)(F)F	GH0305	299.78	9.352	27.261
FN(N(F)F)F	GH0306	300.78	10.046	28.728
ClS(=O)Cl	GH0307	309.77	11.722	29.641
ClSCl	GH0308	281.8	10.067	26.196
FS(=O)F	GH0309	278.79	8.029	19.714
ClS(=O)(=O)Cl	GH0310	311.78	12.01	40.022
[O-][N+](=O)O	GH0311	266.79	7.178	20.969
ON=O	GH0312	252.83	6.193	15.566
OS(=O)(=O)O	GH0313	298.77	9.883	27.053
N#CC#CC#N	GH0314	289.62	11.797	23.317
CC=C=C	GH0315	292.5	13.503	37.837
CC(N)(C)C	GH0316	327.04	16.56	49.165
CCCCN	GH0317	364.79	16.965	42.155
CCC(N)C	GH0318	353.59	16.059	42.263
CCNCC	GH0319	351.62	17.361	42.471
CCCCO	GH0320	362.58	15.941	44.565
CCC(O)C	GH0321	358.44	16.136	45.998
CCOCC	GH0322	342.09	17.349	54.016
CCCOC	GH0323	348.86	17.283	43.375
COC(C)C	GH0324	337.74	16.201	46.616
CSC(C)C	GH0325	358.69	17.81	41.388
CCSCC	GH0326	367.43	18.293	56.004
CCC(S)C	GH0327	366.13	17.196	43.803
CCCCS	GH0328	374.58	18.342	50.269
CCCSC	GH0329	371.11	18.234	49.01
CC(S)(C)C	GH0330	337.45	16.957	49.663
CCSSCC	GH0331	413.84	21.183	60.188
FN1C(F)(F)C(F)(F)C(C(C1(F)F)(F)F)(F)F	GH0332	484.95	20.681	51.636
c1cccnc1	GH0333	282.34	14.156	35.694
C1C=CC=C1	GH0334	267.33	13.732	43.507
N#CCCCC#N	GH0335	368.01	16.404	45.555
Cc1cccs1	GH0336	320.06	16.305	44.326
Cc1cscc1	GH0337	320.77	16.566	45.898
CCC=C=C	GH0338	332.89	16.119	46.379
C=CCC=C	GH0339	332.89	16.477	36.728
C=CC(=C)C	GH0340	315.12	15.445	41.64
C/C=C\C=C	GH0341	323.73	16.245	48.384
CC=C=CC	GH0342	324.15	16.893	36.808
C1CC=CC1	GH0343	289.16	15.107	43.182
C=CC(C)C	GH0344	332.89	16.667	44.846
CC/C=C\C	GH0345	345.69	17.288	53.399
C1CCCC1	GH0346	292.38	15.918	37.228
CCC(=C)C	GH0347	338.95	16.743	49.323
CC=C(C)C	GH0348	337.99	16.448	45.952
CCCC=C	GH0349	345.23	16.812	44.587
CC/C=C/C	GH0350	339.83	17.166	42.552
CCCC(=O)C	GH0351	375.54	17.734	47.912
CCC(=O)CC	GH0352	369.43	17.739	42.063
CCCCC=O	GH0353	382.31	17.191	40.72
CCCCC(=O)O	GH0354	395.94	18.117	43.747
C1CCCSC1	GH0355	322.73	18.182	46.79
SC1CCCC1	GH0356	360.82	18.315	50.539
CCCCC	GH0357	348.36	17.947	44.179
CCC(C)C	GH0358	343.01	17.258	50.693
CC(C)(C)C	GH0359	305.88	16.609	46.466
OCC(C)(C)C	GH0360	370.39	17.593	48.489
CCCCCO	GH0361	401.88	18.399	49.231
CCSCCC	GH0362	413.42	21.172	53.611
CCC(S)(C)C	GH0363	386.28	18.896	42.994
CCCCCS	GH0364	414.71	20.947	56.824
CCCCSC	GH0365	411.16	20.906	57.551
Fc1c(F)c(F)c(c(c1F)F)F	GH0366	382.56	16.645	35.378
Clc1ccccc1Cl	GH0367	340.88	17.868	48.566
Clc1cccc(c1)Cl	GH0368	342.88	17.912	40.955
Clc1ccc(cc1)Cl	GH0369	336.11	18.394	47.585
Fc1ccccc1F	GH0370	321.39	15.504	41.764
Fc1cccc(c1)F	GH0371	319.85	15.881	42.547
Fc1ccc(cc1)F	GH0372	315.08	15.309	44.956
O=C1C=CC(=O)C=C1	GH0373	320.18	15.575	35.989
Brc1ccccc1	GH0374	323.86	17.831	47.229
Clc1ccccc1	GH0375	312.95	16.638	43.715
Fc1ccccc1	GH0376	302.12	15.284	40.846
[O-][N+](=O)c1ccccc1	GH0377	342.51	17.286	38.983
c1ccccc1	GH0378	268.75	15.05	45.699
Oc1ccccc1	GH0379	315.08	16.006	38.742
Sc1ccccc1	GH0380	336.28	17.971	40.71
Nc1ccccc1	GH0381	318.63	16.896	43.899
Cc1ccccn1	GH0382	324.49	16.821	42.754
Cc1cccnc1	GH0383	324.45	16.489	45.13
C1CCC=CC1	GH0384	310.23	17.082	42.482
CC1=CCCC1	GH0385	325.83	17.344	39.922
CC1CCC=C1	GH0386	329.96	17.521	46.794
CC1CC=CC1	GH0387	328.29	17.242	49.048
O=C1CCCCC1	GH0388	334.31	17.557	49.652
C1CCCCC1	GH0389	297.73	17.78	47.775
C1CCCCSC1	GH0390	361.32	19.612	52.834
CC(=C)C(C)C	GH0391	365.04	18.866	54.849
C=CC(C)(C)C	GH0392	343.18	17.98	51.453
CCC(CC)C	GH0393	379.13	18.972	55.456
CCC(C)(C)C	GH0394	357.64	19.007	49.101
CCCCCC	GH0395	387.75	20.492	58.9
CC(C(C)C)C	GH0396	365.17	18.863	49.518
CCCC(C)C	GH0397	379.89	19.567	54.617
CCCCCCO	GH0398	440.76	21.352	50.499
CC(OC(C)C)C	GH0399	389.59	21.619	67.961
CCCOCCC	GH0400	421.78	22.244	61.477
OC1CCCCC1	GH0401	327.16	18.383	42.061
CCCCCSC	GH0402	450	23.706	59.361
CCCSCCC	GH0403	447.62	23.802	63.216
CCCCCCS	GH0404	453.55	23.214	63.65
CC(SC(C)C)C	GH0405	414.8	21.952	59.142
CCCSSCCC	GH0406	494.15	26.227	71.431
CCN(CC)CC	GH0407	404.76	20.784	55.889
FC(C(C(C(F)(F)F)(F)F)(F)F)(C(C(C(F)(F)F)(F)F)(F)F)F	GH0408	663.65	27.163	67.154
FC(c1ccccc1)(F)F	GH0409	371.94	18.759	43.593
N#Cc1ccccc1	GH0410	320.52	17.554	47.44
O=Cc1ccccc1	GH0411	335.44	17.349	38.36
Cc1ccc(cc1)F	GH0412	347.06	17.46	44.369
Cc1ccccc1	GH0413	320.14	17.313	46.746
C1=CC=CC=CC1	GH0414	315.12	17.272	47.995
Cc1ccc(cc1)O	GH0415	347.06	18.231	42.109
OCc1ccccc1	GH0416	372.95	18.38	49.787
COc1ccccc1	GH0417	347.98	18.646	55.449
CCCCCC#C	GH0418	407.02	21.428	61.941
C[C@@H]1CCC[C@H]1C	GH0419	366.21	20.299	53.343
C[C@H]1CC[C@@H](C1)C	GH0420	366.21	20.605	56.213
C[C@@H]1CCC[C@@H]1C	GH0421	365.54	19.669	59.2
C[C@@H]1CC[C@@H](C1)C	GH0422	366.21	20.694	54.234
C1CCCCCC1	GH0423	341.75	19.358	52.663
CC1(C)CCCC1	GH0424	358.69	19.885	53.537
CCCCCCCO	GH0425	479.64	24.262	70.562
CC(OC(C)(C)C)C	GH0426	417.22	22.934	66.28
CCCCCCCS	GH0427	492.44	26.106	69.43
CCCSCCCC	GH0428	492.48	25.524	67.641
COC(=O)c1ccccc1	GH0429	397.4	21.242	58.473
CCc1ccccc1	GH0430	359.86	20.127	52.509
Cc1cccc(c1)C	GH0431	357.1	20.392	46.98
CC(OC(C)(C)C)(C)C	GH0432	426.55	24.295	64.567
CC(=C)c1ccccc1	GH0433	383.02	21.72	55.921
CC(CC(C)(C)C)(C)C	GH0434	430.77	24.111	64.583
c1ccc2c(c1)cccc2	GH0435	335.07	20.958	54.54
C1CC[C@@H]2[C@@H](C1)CCCC2	GH0436	373.91	24.848	63.802
CCc1cccc(c1)CC	GH0437	438.55	25.79	74.418
Cc1cc(C)c(cc1C)C	GH0438	417.81	24.801	69.524
Cc1c(C)ccc(c1C)C	GH0439	415.8	23.968	71.307
C=CC1CCC=CC1	GUT0129	403.05	21.083	61.163
CCCCCBr	GUT0130	408.48	20.658	47.332
CCC(Cl)(C)C	GUT0131	368.18	18.128	48.881
CC(C(Br)(C)C)Br	GUT0132	412.25	21.223	58.639
CCN(c1ccccc1)CC	GUT0133	386.32	25.732	60.951
CNc1ccccc1	GUT0134	341.17	19.29	43.834
CN(c1ccccc1)C	GUT0135	365.84	21.709	66.286
CCCC(CCC)CC	GUT0136	495.53	26.679	61.003
CCCC	RC0002	309.9	15.217	47.054
CCCCCCC	RC0005	427.59	23.241	54.683
CCCCCCCC	RC0006	466.39	25.394	76.334
CCCCCCCCCC	RC0007	544.24	30.542	95.981
CCCCCCCCCCC	RC0008	583.17	33.702	102.4
CCCCCCCCCCCC	RC0009	622.05	36.158	95.203
CCCCCCCCCCCCCCCC	RC0010	777.75	46.539	136.508
CCCCCCCCCCCCC	RC0011	660.97	38.857	105.418
CCCCCCCCCCCCCCC	RC0012	738.82	43.812	124.304
CCCCCCCCCCCCCCCCCC	RC0013	855.6	51.99	159.555
C=CC=C	RC0015	278.54	13.138	34.705
CCC=C	RC0017	305.38	14.378	39.987
CCCCCCCCC=C	RC0018	540.06	30.307	77.826
CCCCCC=C	RC0019	423.28	22.434	56.338
CCCCC=C	RC0020	384.36	19.544	60.569
CCCCCCCC=C	RC0021	501.13	27.509	74.676
CCCCCCC=C	RC0022	462.21	24.277	68.468
CC(=C)C	RC0027	293.38	14.169	38.383
CCCC(=C)C	RC0028	381.89	19.007	52.761
CCC#C	RC0030	290.62	13.295	41.779
CCCCCCCCC#C	RC0031	524.13	28.533	86.051
CCCCCCCCCCCCCCC#C	RC0032	757.68	44.203	124.232
CCCCC#C	RC0033	368.47	18.18	50.477
CCCCCCC#C	RC0034	446.32	23.928	60.506
CCCC#C	RC0035	329.55	15.977	46.583
CC#CC	RC0036	283.1	13.744	37.43
CC(C#C)C	RC0039	318.72	15.805	44.191
CC(C(C)C)C(C)C	RC0041	427.76	22.865	50.482
CCCC(C(C)C)C	RC0042	443.65	23.795	63.624
CCC(C(C)C)C	RC0043	413.75	21.281	59.212
CCC(CC(C)C)C	RC0044	445.32	24.154	55.775
CC(CCC(C)C)C	RC0045	438.71	24.47	66.786
CCCCC(C)C	RC0047	419.69	22.398	59.294
CCCCCCCC(C)C	RC0048	534.08	29.968	85.114
CCCCCCC(C)C	RC0049	495.53	27.633	74.096
CC(C)C	RC0051	294.43	14.838	42.242
CCC(C(C)C)CC	RC0052	440.8	23.227	60.584
CCCC(CC)CC	RC0053	457.86	23.992	63.512
CCC(CC)CC	RC0054	411.2	21.548	49.038
CCCC(CCC)C	RC0055	453.01	24.781	67.93
CC(C(C)(C)C)(C)C	RC0056	389.08	21.72	56.519
CCC(C(C)(C)C)C	RC0057	424.87	22.175	66.457
CC(CC(C)(C)C)C	RC0058	422.91	23.152	61.18
CCCCC(C)(C)C	RC0060	430.89	23.663	64.161
CCC(C(C)C)(C)C	RC0062	431.23	22.412	61.473
CCCC(CC)(C)C	RC0063	437.75	23.478	60.439
CCC(CC)(CC)C	RC0064	432.65	22.925	68.401
CCC(CC)(CC)CC	RC0065	461.21	24.095	68.225
CC1(C)CCCCC1	RC0066	364.75	21.447	45.885
CCCCC1CCCCC1	RC0070	458.15	26.751	71.723
C1CCC1	RC0071	265.2	13.832	33.553
C1CC=C1	RC0072	263.32	12.451	34.326
C1CCCCCCC1	RC0075	366.51	21.006	59.684
CCCCCCCCCCC1CCCC1	RC0079	689.41	41.487	115.562
CCC1CCCCC1	RC0080	382.31	22.021	55.676
CCCCCCCC1CCCC1	RC0081	572.63	33.571	85.449
CCCCCCC1CCCC1	RC0082	533.75	30.516	93.177
CC1CCCCC1	RC0083	343.09	20.109	52.973
CCCCCCCCCC1CCCC1	RC0084	650.48	39.03	98.911
CCCCCCCCC1CCCC1	RC0085	611.55	35.903	80.818
CCCCCC1CCCCC1	RC0086	497.08	29.661	80.579
CCCC1CCCCC1	RC0087	419.23	24.595	73.26
CCCC1CCCC1	RC0088	416.97	23.135	61.506
Cc1cc(C)c(c(c1)C)C	RC0090	422.24	24.275	65.814
Cc1c(C)cccc1C	RC0091	384.57	22.295	68.037
CCc1ccc(c(c1)CC)CC	RC0093	517.78	30.361	83.259
Cc1ccc(c(c1)C)C	RC0094	395.48	22.019	56.714
CCc1cc(CC)cc(c1)CC	RC0095	507.32	31.025	81.402
Cc1cc(C)cc(c1)C	RC0096	385.03	22.69	60.718
Cc1ccc(cc1)C	RC0098	352.17	20.132	55.693
CCc1ccc(cc1)C	RC0099	398.62	23.231	60.597
CCCCc1ccccc1	RC0101	439.17	25.368	60.808
CCCCCCCCCCCCc1ccccc1	RC0102	751.03	47.007	125.671
CCc1c(CC)c(CC)c(c(c1CC)CC)CC	RC0104	696.64	39.632	116.994
Cc1c(C)c(C)c(c(c1C)C)C	RC0105	452.05	28.641	76.904
CC(c1ccccc1)C	RC0106	388.29	21.853	60.28
CCCCCCCCCc1ccccc1	RC0107	634.3	38.574	99.535
CCCCCCCCc1ccccc1	RC0108	595.37	35.647	80.691
CCc1cc(CC)c(c(c1CC)CC)CC	RC0109	647.43	37.479	99.597
CCCCCc1ccccc1	RC0110	478.6	27.983	70.206
CCCc1ccccc1	RC0111	400.37	23.09	58.265
CCCCCCCCCCCc1ccccc1	RC0112	712.11	43.106	117.179
C#Cc1ccccc1	RC0113	321.44	18.041	50.982
Cc1ccc2c(c1C)cccc2	RC0114	406.52	25.569	63.294
Cc1ccc(c2c1cccc2)C	RC0115	400.79	25.34	63.376
Cc1cccc2c1cccc2C	RC0116	400.79	25.1	64.232
CCCCc1cccc2c1cccc2	RC0117	496.83	31.116	84.92
CCc1cccc2c1cccc2	RC0118	417.85	25.35	68.485
Cc1cccc2c1cccc2	RC0119	377.17	23.219	59.801
CCCCCc1cccc2c1cccc2	RC0120	536.26	33.481	84.1
Cc1cc2ccccc2cc1C	RC0121	410.66	25.616	67.902
Cc1ccc2c(c1)ccc(c2)C	RC0122	408.4	26.266	75.301
CCCCc1ccc2c(c1)cccc2	RC0123	499.46	31.51	82.703
CCc1ccc2c(c1)ccc(c2)C	RC0124	454.85	28.524	71.262
CCc1ccc2c(c1)cccc2	RC0125	420.44	26.351	67.13
Cc1ccc2c(c1)cccc2	RC0126	379.76	23.257	51.5
CCCc1ccc2c(c1)cccc2	RC0127	460.66	28.946	78.154
c1ccc(cc1)c1ccccc1	RC0128	392.39	25.992	66.762
Cc1ccc2c(c1)c(C)ccc2	RC0129	409.15	25.59	66.128
CCc1ccc2c(c1)cc(cc2)C	RC0130	454.85	28.959	81.414
CCCCCCCCC	RC0132	505.32	27.961	77.895
CCCCCCCCCCCCCC	RC0133	699.9	41.295	111.178
CCCCCCCCCCCCCCCCC	RC0134	816.67	49.388	131.634
CCCCCCCCCCCCCCC=C	RC0136	773.57	46.309	122.933
CCCCCCCC#C	RC0140	485.25	26.364	69.829
CCC#CC	RC0141	331.55	16.911	47.877
CC(CC(C)C)C	RC0143	396.36	21.829	60.316
CCCCCC(C)C	RC0144	454.93	25.382	76.581
CCC(C(CC)C)C	RC0145	447.99	22.89	53.771
CCCCC(CC)C	RC0146	461.25	24.349	67.87
CC(C(C)(C)C)C	RC0147	383.31	20.501	53.345
CCCC(C)(C)C	RC0148	392.6	21.456	53.695
CCC(CC)(C)C	RC0149	399.41	20.638	53.44
CCCCC1CCCC1	RC0151	455.9	26.073	69.919
CCC1CCCC1	RC0153	378.05	20.562	45.227
CC1CCCC1	RC0154	339.66	18.4	46.114
CCCCCC1CCCC1	RC0155	494.82	28.431	69.446
CCc1c(CC)cccc1CC	RC0156	506.86	28.228	71.593
Cc1ccccc1C	RC0157	352.5	19.69	58.922
CCc1ccc(cc1)CC	RC0158	433.7	25.553	76.535
CCCCCCCCCCc1ccccc1	RC0159	673.22	40.662	102.025
CCCCCCCc1ccccc1	RC0160	556.45	33.952	84.832
CCCCCCc1ccccc1	RC0161	517.52	30.978	74.381
Cc1cc(C)c(c(c1C)C)C	RC0162	443.56	26.132	70.686
Cc1cc2ccccc2c(c1)C	RC0164	409.15	25.743	67.189
Cc1ccc2c(c1)cccc2C	RC0165	409.15	25.149	65.372
CCCc1cccc2c1cccc2	RC0166	458.03	28.346	74.186
CCc1cc2ccccc2cc1C	RC0167	457.11	27.973	73.382
CCCCCc1ccc2c(c1)cccc2	RC0168	538.89	33.609	79.176
Cc1ccc2c(c1)cc(cc2)C	RC0170	408.4	25.84	59.528
CI	RC0175	253.54	11.498	32.714
CCI	RC0180	296.1	14.067	43.456
ICI	RC0184	309.18	15.56	34.941
CCCI	RC0189	335.82	16.773	46.659
CC(I)C	RC0193	324.24	16.123	42.98
ICCI	RC0195	348.28	18.314	53.33
CCCCBr	RC0196	369.18	18.046	53.971
CCC(Br)C	RC0197	370.02	17.623	47.186
CCCCCl	RC0198	357.81	16.793	50.346
CCC(Cl)C	RC0199	359.32	16.48	45.671
CCCC(CC)C	RC0209	423.83	21.312	58.195
ClCC(C)C	RC0221	353.55	16.3	48.87
CCCCCCC=O	RC0225	461.33	22.57	72.298
CCC(O)(C)C	RC0230	362.49	17.672	48.934
OCC(C)C	RC0232	358.77	15.496	43.779
CCCC[N+](=O)[O-]	RC0233	394.18	18.437	53.413
CCCCCCCCS	RC0237	531.82	29.069	84.12
[O-][N+](=O)OCCC	RC0245	385.07	16.488	43.662
CCCCSCC	RC0248	452.68	23.427	69.132
Cc1cccc(c1)O	RC0257	356.51	18.431	51.152
CCc1ccccc1CC	RC0261	434.03	24.75	67.735
C1CCS1	RC0266	285.02	14.182	38.736
C1CCCS1	RC0268	309.14	15.933	42.335
CC(Cl)(C)C	RC0271	321.94	16.303	44.844
Cc1ccccc1O	RC0279	357.35	17.818	47.699

## Sheet: G4_EXPT_NMA
MOLID	G4	CCGenFF	GAFF-ESP	GAFF-BC	S0_Exp
GH0061	294.1	296.2	293	297.5	277.79
GH0242	342.9	348.4	359.1	409.8	343.76
GH0121	294.1	301.8	303	303.1	299.78
GH0377	342.1	355.1	352.9	355.2	342.51
GH0151	315.5	374.3	326.8	326.3	317.76
GH0249	349.4	379.4	350.9	356.8	349.74
GH0245	356.2	381.3	363.9	365.7	373.74
GH0064	298.5	383.6	310.5	309.4	303.79
GH0210	308.7	318.2	306.4	306.2	304.79
GH0007	333.5	334.3	333.4	333.4	334.77
GH0196	305.8	311.4	304.6	304.4	345.77
GH0095	406.9	407	412.5	412.6	399.7
GH0088	365.4	363.5	373.5	373.6	365.75
GH0141	327.3	327.4	332.4	332.4	327.75
GH0239	314.7	314.1	317.8	318	315.79
RC0197	344.9	343.8	346.1	346	370.02
GH0053	293.7	295.5	294.7	294.7	292.8
GH0146	286.7	286.9	289	289	286.77
GH0212	357.3	357.7	361.2	361.8	376.75
GH0198	308.8	310.4	317.6	323.8	316.75
GH0131	324.8	326.1	330.2	330.2	329.76
GH0236	318.8	318.4	319.7	319.8	330.76
RC0196	350.8	349.2	350.6	350.3	369.18
GUT0130	382.4	380.5	380.7	380.8	408.48
GH0050	287.8	289.2	289.3	289.3	286.77
GH0263	319	321.4	325.4	323.9	307.76
GH0262	319	321.4	325.4	323.9	307.76
RC0113	333.7	336.9	324.8	324.8	321.44
GH0028	222.9	229	220.5	220.5	224.85
GUT0129	359.1	363.3	357.6	357.7	403.05
GH0037	289.3	291.6	293.3	293.3	283.81
GH0025	258.7	260.9	263	263	258.8
GH0020	207.7	220.7	219.2	219.2	213.86
GH0102	271.1	277.8	272	271.6	271.81
GH0041	246.4	248.6	247.8	247.8	246.8
GH0060	260.7	255.8	252.8	252.6	248.81
GH0056	248.2	248.9	250	250	248.81
GH0138	285.3	283.4	281.9	281.5	290.79
GH0191	303.1	308.5	302.5	301.9	304.79
GH0219	317	313.3	313.9	314.9	327.75
GH0261	319	321.4	325.4	323.9	313.78
GH0122	294.1	294.5	297.4	297.5	294.8
GH0220	326.9	323	316.6	316.2	322.77
GH0135	261.8	262.3	265.7	266	263.82
RC0052	418.7	409.2	406.4	406.8	440.8
RC0064	409.7	402.6	396	394.5	432.65
RC0054	392.8	395.9	384.9	384.8	411.2
RC0053	418.5	415.9	407.6	407.4	457.86
RC0099	402.4	405.4	399.6	399.8	398.62
GH0430	358.9	404.7	403.6	402.7	359.86
RC0118	401.6	398.2	394	394.1	417.85
RC0125	408.7	411.4	405.3	405.2	420.44
RC0153	362.8	358.6	358.3	358.1	378.05
RC0080	371.8	365.9	363.8	363.6	382.31
GH0172	271.8	275	270.6	270.6	283.81
GUT0133	433.7	436.6	427.1	427.3	386.32
GH0319	334.8	341.3	332.3	332.6	351.62
GH0162	270.3	269.5	272.6	272.6	280.8
GH0322	334.3	335.2	337.1	337.3	342.09
GH0161	284.8	285.4	285.7	285.6	293.8
GH0154	353.1	350.1	354.5	355.1	340.75
GH0326	355.7	354	352.9	352.9	367.43
GH0192	286.6	297	279.4	279.6	292.8
GH0005	233.1	232.7	229.7	229.7	241.83
GH0208	313.1	306.9	297.8	296.9	300.78
GH0181	272.4	271.4	287.2	336.1	273.81
GH0189	278.2	282.9	273.6	273.7	288.78
GH0243	293.8	302.1	295.4	296.6	311.78
GH0228	294.3	302.6	302.3	302.1	307.76
GH0429	389.1	387.8	384.8	383.1	397.4
GH0410	322.6	323.6	316.9	316.9	320.52
GH0411	332.6	334.2	331.3	331.2	335.44
GH0224	317.9	317	325.4	326	309.77
GH0205	284.4	285.4	279.5	279.5	284.81
GH0223	292.9	292	299.1	299.9	304.79
RC0111	383.7	384.3	380.1	380.8	400.37
GH0269	303.3	306.1	302	301.7	324.78
GH0253	302.9	300.3	303.1	303.1	322.77
GH0400	399.3	400.3	398.6	398.6	421.78
GH0260	319	317.3	316.4	316.8	336.74
GH0403	420.4	417.3	414.9	415.2	447.62
RC0101	419.4	423.2	416.1	416.2	439.17
RC0151	426.6	413.2	411.6	411.4	455.9
GH0317	335.3	336.9	331.9	332.2	364.79
GH0320	334.9	331.2	333.4	333.6	362.58
GH0328	350.3	348.1	347.1	347.2	374.58
GH0287	326.1	327.2	315.2	315.1	326.75
GH0354	382.4	379.6	387	386.9	395.94
GH0398	398.6	393.8	394.6	394.5	440.76
GH0404	414.6	410.7	408.1	408.2	453.55
GH0425	430.6	425.1	424.9	425	479.64
GH0427	446.6	442	438.5	438.6	492.44
GH0276	333.8	338	329.1	329.3	366.76
GH0252	329.4	326.6	332.8	332.5	357.73
GH0174	294.5	301.2	293.5	293.4	321.77
GH0163	301.6	294.5	304.3	304.6	303.79
GH0155	316.4	321	320.8	320	344.77
GH0127	315.8	312.7	314.1	313.7	311.78
GH0218	343.2	343.5	336	335.2	321.77
GH0419	363.7	365.3	358.6	358.5	366.21
GH0421	356	354.4	353.2	351.8	365.54
GH0422	362	363.6	357.2	358.9	366.21
GH0221	279.6	281.4	283.5	283.6	286.77
GH0345	332.9	342.2	326.6	326.3	345.69
GH0350	330	341.4	329.8	329.9	339.83
GH0190	247.7	257.3	240.6	240.5	247.81
GH0282	241.9	256.7	234.7	234.8	249.81
RC0030	289.4	297.4	281.4	281.4	290.62
RC0035	321	328.2	312.1	312.2	329.55
RC0033	353.1	358.9	342.8	342.6	368.47
GH0418	385	390.2	373.1	373.1	407.02
RC0034	413.5	410.7	392.2	392.2	446.32
RC0140	448.6	452.9	434.1	434	485.25
GH0433	368.6	365.5	349.4	349.3	383.02
GH0341	317.3	323.7	374	382	323.73
GH0225	264.4	280.5	263	262.9	266.79
GH0283	277.3	287.7	269.2	269.2	279.79
RC0015	276.3	277.4	274.4	274.4	278.54
RC0017	296.8	297.4	297.3	297.4	305.38
GH0349	325.1	326.1	324.6	324.1	345.23
RC0020	360.6	359.8	358.6	358.7	384.36
RC0022	423.4	417.8	414.1	413.6	462.21
RC0106	380.9	378	377.3	376.6	388.29
RC0128	385.1	389.1	381.4	381.9	392.39
GH0416	353.5	355.1	353.2	355.9	372.95
GH0379	311.7	316	313.1	313.6	315.08
GH0417	342.1	343.6	347.3	347.9	347.98
GH0380	334.7	426.2	401.5	417.1	336.28
GH0373	332.2	330.5	320.7	320.8	320.18
GH0244	279.1	350.9	346	292.2	284.81
GH0388	333	331.7	328.9	329.2	334.31
GH0401	336.8	334.6	338	338.2	327.16
GH0378	268.2	268.5	267.8	267.8	268.75
GH0414	315.4	315.3	313	312.9	315.12
GH0334	273.2	280.7	278.7	278.7	267.33
GH0435	331.8	327.6	326.7	326.8	335.07
GH0343	290.8	290.1	298.1	301.4	289.16
GH0384	309.3	318.6	306.9	307	310.23
GH0230	237	238.4	238.4	238.5	237.82
GH0436	379.6	375.3	376.7	376.6	373.91
RC0071	263.9	261.1	260.2	260.1	265.2
GH0389	297.5	298.7	296.9	296.9	297.73
RC0075	378.5	382.1	366.8	484.6	366.51
GH0160	227.7	227.8	227.9	227.9	228.83
RC0027	289.4	297.2	287.2	286.9	293.38
GH0391	355.2	350.8	354.8	352.2	365.04
GH0340	310.4	378.6	316.5	315.6	315.12
GH0347	328.4	329.4	325.4	325.2	338.95
RC0028	357.8	358.6	352.1	352.4	381.89
RC0147	388.8	374.6	372	371.5	383.31
GH0359	326.9	327.5	321.9	322.9	305.88
GH0316	324.8	325.9	321.6	321.8	327.04
GH0432	426	419.9	410.3	415.9	426.55
GH0330	337.1	337.6	336.3	336.6	337.45
RC0058	412.3	408.4	397.9	401.2	422.91
GH0394	357.5	360.6	349	349.1	357.64
RC0230	354.8	353.2	353.7	352.8	362.49
RC0148	389.5	384.2	378.6	379.5	392.6
RC0060	420.8	406.1	408.7	406.7	430.89
GH0348	331	335.2	339.1	386.8	337.99
RC0051	302.3	301.5	300	300.6	294.43
RC0041	411	396	399	398.6	427.76
GH0396	360.8	351.7	352.5	352.2	365.17
RC0062	418.4	403.6	397.8	396.8	431.23
RC0043	386.3	374.3	377.2	375.8	413.75
RC0042	421.6	408.9	403.2	403.4	443.65
GH0358	333.2	328.6	327.9	327.9	343.01
RC0143	391.8	384.9	380.4	381.4	396.36
RC0044	421.6	415.4	408.9	409.9	445.32
GH0397	366	361.5	359.2	359.7	379.89
RC0045	421.5	415.2	411.5	411.3	438.71
RC0047	397.9	389.1	389.8	390.1	419.69
RC0144	429.8	420.4	420.4	420.6	454.93
RC0048	493.1	483.1	481.2	481.5	534.08
GH0270	299.9	298.1	297.7	298.3	311.78
GH0255	298.3	295.3	301.6	301.8	311.78
GH0399	384.7	382.3	383.8	388.6	389.59
GH0254	313	312.6	313.2	313.5	323.78
GH0405	412.3	399.9	405.8	406	414.8
RC0039	318.3	324.3	308.5	308.8	318.72
GH0392	346.4	343.1	344.8	343.8	343.18
GH0344	325.4	321.8	327.3	327.9	332.89
RC0149	388.5	385.8	375.3	374.8	399.41
RC0063	418.4	412.5	400.2	400.9	437.75
RC0145	417.1	402.7	404.3	403.4	447.99
GH0393	363	360.2	356.7	356.1	379.13
RC0209	398.7	392.7	389	389	423.83
RC0146	432	420.6	418.9	418.7	461.25
GH0351	368.8	364.3	362.6	364.1	375.54
RC0055	423.4	417	409.4	409.6	453.01
GH0360	353.7	353.6	348.2	348.4	370.39
RC0232	327.9	329.4	329.3	328.6	358.77
RC0036	304	345.4	346.7	369.6	283.1
RC0141	345.2	389.8	349	368.7	331.55
RC0257	359.3	359.8	413.8	357.8	356.51
GH0383	328.5	396.8	337.1	381.8	324.45
GH0336	321.1	320.5	389	387.6	320.06
GH0424	354.4	358.2	350.4	350.2	358.69
RC0066	363.7	361.2	356.7	357.2	364.75
GH0439	427.2	482	484	465.8	415.8
RC0091	386.7	405.2	444.3	464.3	384.57
RC0094	400.8	404.6	406.6	400.8	395.48
RC0279	344.1	351.1	345.9	346.9	357.35
GH0415	368.7	359.8	404.6	414.6	347.06
RC0119	373.1	373.4	368.6	368.4	377.17
GH0385	322.3	327.3	330.4	332.4	325.83
GH0337	319.7	335.1	335.9	335.6	320.77
GH0382	328.8	388.1	383.1	381.8	324.49
GH0386	319.3	313.5	320.2	320.1	329.96
GH0387	318.8	313.5	318.9	318.8	328.29
RC0154	340.6	338.7	334.6	334.5	339.66
RC0083	341	338.6	338.8	338.8	343.09
GH0235	279.6	281.4	283.5	283.6	286.77
GH0258	268.5	268.8	268.1	268.1	269.8
GH0352	370.5	363.8	366	366.8	369.43
RC0002	300.4	299.9	298.8	298.6	309.9
GH0395	370	367.4	365.4	365.3	387.75
RC0005	401.9	398.7	396	395.8	427.59
RC0006	433.9	430.1	426.3	426.2	466.39
RC0132	465.7	461.4	456.8	456.7	505.32
RC0007	497.8	492.7	487.3	487.2	544.24
RC0008	529.5	524	517.7	517.6	583.17
RC0009	561.7	555.4	548.2	548.1	622.05
RC0012	657	649.4	639.6	639.5	738.82
RC0010	689.9	680.7	670.1	670	777.75
GH0206	299.2	306.1	294.7	294.7	299.78
GH0194	330.9	340.1	335.3	335.3	337.74
GH0100	289.4	298.2	288.6	288.7	289.79
GH0193	329.6	340.6	340.9	337.1	337.74
GH0104	290.3	299.5	289.4	289.4	289.79
GH0277	465.1	459.7	460.2	460.3	465.68
GH0006	341.1	339.5	342.4	342.4	340.75
GH0002	321.6	323	322.4	322.4	321.77
GH0197	294.1	299.6	293.6	293.4	295.81
GH0097	287.8	290.8	288.2	288.3	288.78
GH0083	324.7	329.9	325	325	324.78
GH0015	376.7	381.2	388.1	388.1	364.75
GH0106	344.6	357.7	356.9	356.4	341.75
GH0009	405.5	406.1	425.5	424.7	397.7
GH0082	383.8	383.1	398.4	398.4	381.73
GH0096	360.7	360.1	370.8	371.1	359.73
GH0011	396.4	396.2	413.7	413.4	391.72
GH0012	387.9	387.1	402.9	403	385.74
GH0013	386.9	383.2	401.9	402	380.72
GH0077	377.7	374.6	390.5	390.7	386.74
GH0078	368.4	363.5	379.9	380.1	363.75
GH0076	377.2	372.6	390.1	390.4	369.73
GH0008	368.3	364.3	379.6	379.9	366.76
GH0001	358.7	353.7	369.4	369.7	357.73
GH0092	354.1	350.1	363.1	363.2	352.75
GH0090	344.5	341.5	352.5	352.7	348.74
GH0093	355.4	352.1	364.5	364.8	357.73
RC0271	327.7	324.6	330.7	331.3	321.94
GH0227	328.2	324.8	337.9	338.2	324.78
GH0112	329.4	327.7	342.7	342.6	320.77
GH0126	319	317.9	331.1	331.1	318.76
GH0115	307.8	306.1	319.4	319.5	306.76
GH0240	303.1	301.3	306.8	307	305.8
GH0129	303.9	303.1	311	311.1	304.79
GH0134	293.1	292.6	299	299.1	300.78
GH0004	342.1	342.5	343.6	343.3	336.74
GH0107	358.3	358.4	371.5	371.9	355.76
GH0114	334.6	334.9	344.1	344.1	335.78
GH0109	348.5	345.8	359.3	359.6	349.74
GH0234	357.6	358.2	365.8	365.4	395.73
GH0086	302.5	310.2	303.7	303.6	302.79
GH0367	347.6	350.7	348.3	348.3	340.88
GH0368	348.9	351.5	349.4	349.4	342.88
GH0369	349	351.5	349.4	349.4	336.11
GH0147	275	274.9	277.9	277.9	275.82
GH0099	323.4	323.7	336.6	339.1	325.78
GH0209	357.9	351.9	350.1	351	372.74
RC0221	333.7	332.6	332.5	333.1	353.55
GH0214	334	332.9	339.7	339.9	354.76
GH0251	329.5	330.9	334.6	334.5	364.75
GH0195	362.3	363.2	369	369.9	382.73
GH0233	363.9	370.5	458.4	374.8	402.71
GH0250	353.6	358.2	359.9	359	407.69
GH0111	326.9	324.6	336	336.1	326.75
GH0182	290.8	298.7	284	283.9	287.78
GH0199	297.3	298.6	307.9	313.2	306.76
GH0125	298.2	307.9	299.8	300.4	303.79
GH0237	307.2	306.4	308.5	308.6	316.75
RC0198	339.2	337.1	339.2	339.1	357.81
GH0216	340.4	338.3	343.3	343.4	367.72
GH0132	301.5	301.9	307.8	307.8	307.76
GH0248	336.8	332.7	337.8	337.8	362.74
GH0054	270.4	271.4	272.8	272.8	269.8
GH0144	305.7	299.8	306.7	306.7	320.77
GH0051	264.5	265.2	266.4	266.4	263.82
GH0308	282.2	282.8	283.7	283.7	281.8
GUT0135	382	400	384.8	385.6	365.84
GH0120	293.2	290.2	361.1	360.3	270.8
GH0171	271.3	272.6	270.5	270.5	271.81
GH0169	318.9	324.1	319.2	318	305.8
GH0152	290.6	349.2	377.6	350.8	280.8
GUT0134	347.8	347.5	354.5	354.1	341.17
GH0268	303	300.7	301.5	301.6	335.78
GH0164	263.9	266.4	265.5	265.5	266.79
GH0324	332.3	330.9	330.9	331.6	337.74
GH0229	285.1	286.4	289.9	289.8	307.76
GH0257	302	303.7	304.3	304.3	308.77
GH0323	334.4	336.2	334.9	334.9	348.86
GH0259	331.2	332.1	333.1	338.1	358.73
GH0256	322.3	321.6	320.4	320	335.78
GH0158	322.2	317.3	322.8	322.3	310.77
GH0065	321	318.7	325.1	325.2	312.78
GH0159	307.9	308	307.9	308.1	305.8
GH0157	284	285.7	283.5	283.6	285.81
GH0325	349.4	347.8	346.5	346.7	358.69
GH0264	322.8	322.6	321.1	321.2	332.77
GH0365	386.9	385	382.7	382.8	411.16
GH0402	418.9	416.3	413.1	413.3	450
GH0156	329.1	329.2	326.8	326.9	335.78
GH0200	287.1	296.1	284	284	297.77
GH0101	274.3	284.4	273.2	273.2	268.8
GH0201	285.2	296	284.3	284.2	297.77
GH0279	444.8	426.6	591.7	506.6	433.7
GH0278	398	402.8	394.3	394.3	372.74
GH0014	311	313.3	311.7	311.7	299.78
GH0202	283.4	289.7	283.2	282.8	295.81
GH0098	264.5	270.2	266.5	266.4	265.83
GH0085	292.1	300.2	292.8	292.8	291.79
GH0110	346.7	344.8	355	356.1	313.78
GH0084	338.9	338.2	352.8	352.8	332.77
GH0176	398.9	403.2	403.5	404.2	392.72
GH0185	360	352.6	368.7	368.3	356.76
GH0184	368.3	359.3	371.9	372.2	383.73
GH0010	348.3	345.2	359.8	360.1	333.77
GH0089	334.5	331.7	342.3	342.5	331.76
GH0108	320.1	317.9	325.6	325.6	319.76
GH0113	295.7	295.8	307.8	307.9	281.8
GH0241	293.2	291	294.8	295.2	292.8
GH0130	281.3	280.8	286.9	287	282.8
GH0003	297.6	298.1	297.2	297.2	297.77
GH0183	364.1	360.5	373.3	373.6	382.73
GH0094	316.9	316	327.5	327.7	316.75
GH0124	302.5	302	308.6	308.7	310.77
GH0409	377.8	385.9	386.6	386.2	371.94
GH0087	361.2	350.2	366.9	366.4	336.74
GH0142	308.5	306.8	311.2	311.2	291.79
GH0081	229.2	240.8	222.9	222.9	231.84
GH0280	419.2	423.1	413.1	413.1	400.71
GH0370	325.9	327.6	327.1	327.2	321.39
GH0371	325.5	329.3	327.9	327.6	319.85
GH0412	355.6	352.9	352.2	352.6	347.06
GH0372	314	317.7	316	316	315.08
GH0376	301.4	303.4	302.3	302.3	302.12
GH0149	263.7	263.8	265.8	265.8	264.82
GH0213	314.4	311.1	316.9	316.9	324.78
GH0203	286.6	291.5	295.5	296.2	299.78
GH0238	294.7	294.7	295.4	295.4	303.79
GH0133	286.7	285.2	289.4	289.6	288.78
GH0055	246.4	252.7	254.2	254.2	246.8
GH0312	247.8	325	250.7	250.9	252.83
GH0063	285.7	422.4	285.9	345	284.81
GH0043	238.3	239.5	296.2	305.1	237.82
GH0047	250	252.3	308.8	327.5	247.81
GH0286	280.2	285	280.9	280.5	281.8
GH0148	249.7	254	251.7	251.8	250.82
GH0070	272.6	283.5	273.3	271.3	266.79
GH0072	292.3	301.1	292.3	293	302.79
GH0266	323.7	328.7	327.3	326.7	362.74
GH0381	315.8	314.4	320.2	319.4	318.63
GH0150	305.6	315.9	314.4	311	329.76
GH0273	333.2	332.6	330.6	331	366.76
GH0170	300.1	301.1	300.1	300.2	319.76
GH0018	234.8	294.3	234.1	234.1	235.85
GH0069	269.1	270.6	268.3	268.4	278.79
GH0281	309.5	310.4	305.6	305.6	316.75
GH0232	309.9	308.1	311.6	311.6	321.77
GH0188	297.1	294.7	299.2	299.1	276.78
GH0285	266.5	268.8	270	270	266.79
GH0180	269.8	272	275.7	275.7	270.8
GH0137	242.4	242.7	244.5	244.6	242.83
GH0222	279.1	284.9	284.9	279.4	264.82
GH0215	288.4	294.3	300.2	300.9	286.77
GH0231	325.9	327.2	331.3	333.9	342.76
GH0204	313	310.8	307.9	308	330.76
GH0310	313.9	314.2	319.3	319.3	311.78
GH0166	387.6	381.7	391.1	390.5	334.77
GH0165	375.1	372.9	379.8	384.2	359.73
GH0313	303.7	303.3	315	325.1	298.77
GH0143	255	262.7	261.1	261.1	254.83
RC0268	306.1	311.1	309.1	309.2	309.14
GH0355	323.3	325.5	323.1	323.1	322.73
GH0226	324.6	325.6	329.2	332.5	322.77
GH0168	321	310.6	314.6	314.5	325.78
RC0266	286.4	283	291.4	291	285.02
